# Supplementary material for: Synthesis of (±)-likonide B (smenochromene D) using a regioselective Claisen rearrangement, separation of the enantiomers and stereochemical assignment
Source: Royal Society of Chemistry journal article supplement (doi:10.1039/b901358j), 2009-01-01

**Synthesis of (±)-Likonide B (Smenochromene D) using a Regioselective Claisen Rearrangement, Separation of the Enantiomers and Stereochemical Assignment**

Marjorie Bruder, Stephen J. Smith, Alexander J. Blake and Christopher J. Moody

**NMR data**

$^1\text{H}$  and  $^{13}\text{C}$  NMR spectra were recorded using a Bruker AV400 instrument (400 MHz  $^1\text{H}$  frequency, 100 MHz  $^{13}\text{C}$  frequency) in  $\text{CDCl}_3$ , unless otherwise specified.

(5*E*,9*E*)-6,10-Dimethyl-11-*tert*-butyldimethylsiloxyundeca-5,9-dien-2-one **8**

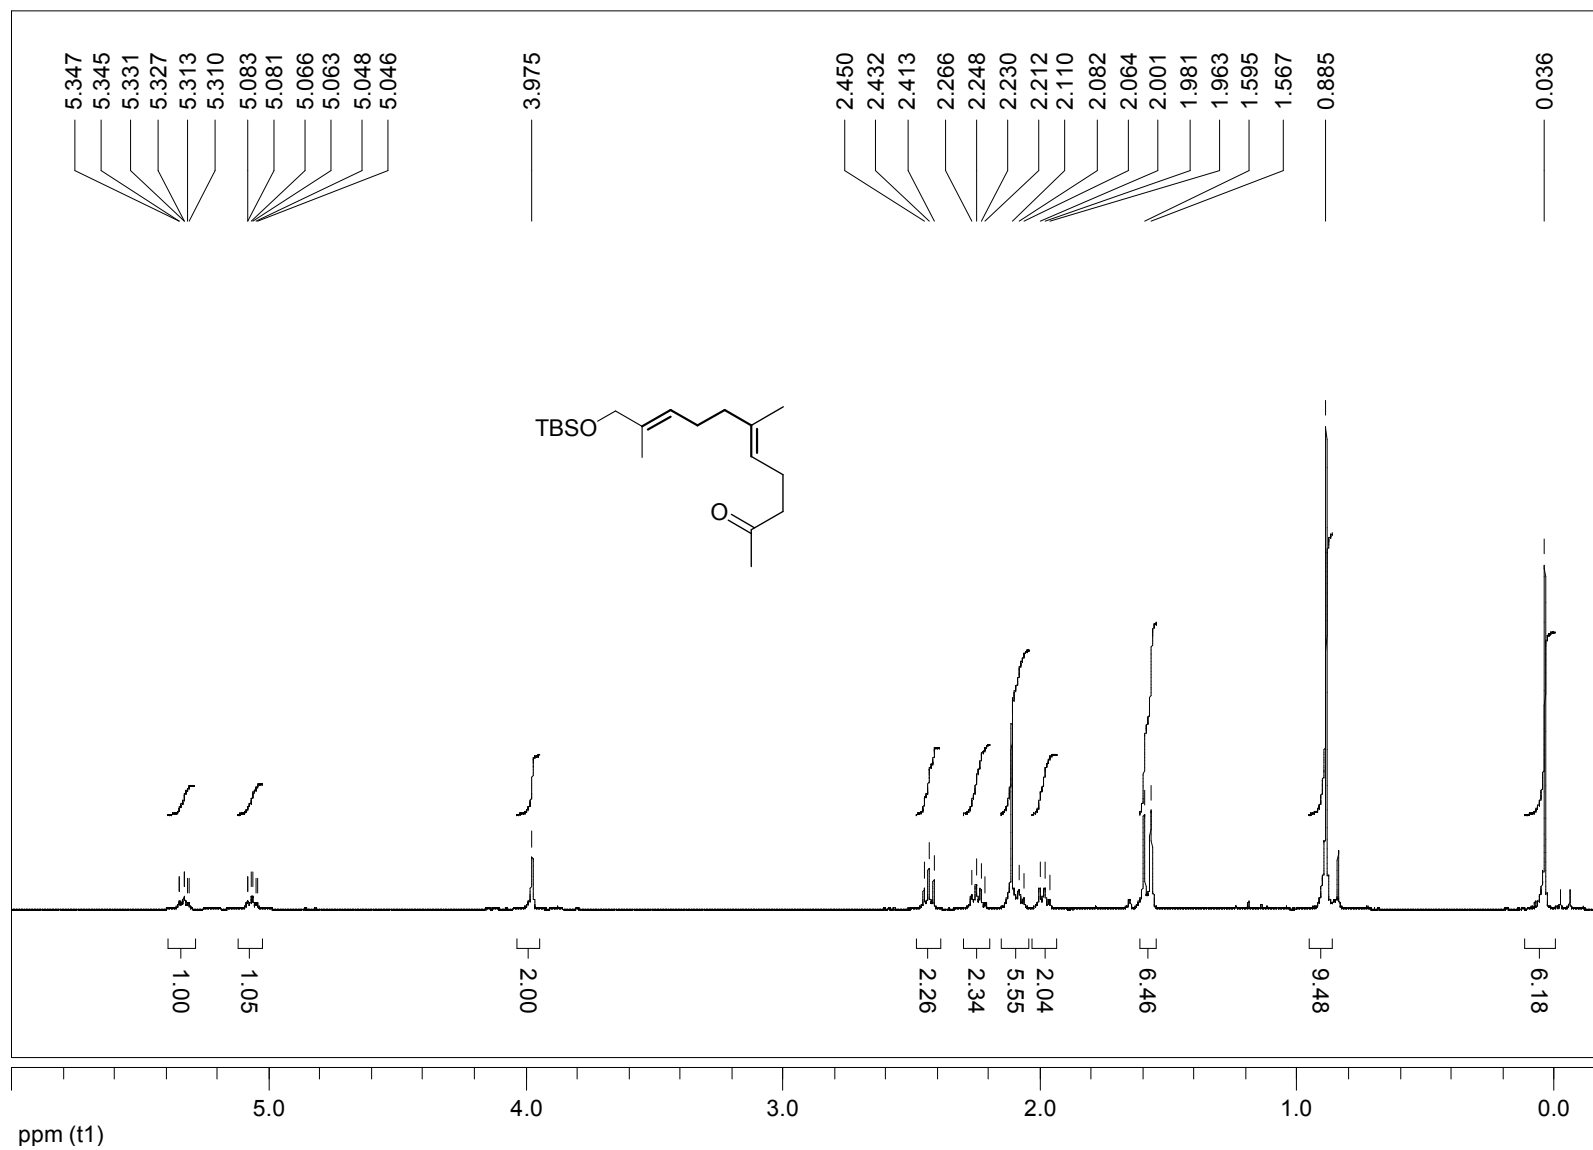



(6*E*,10*E*)-12-*tert*-Butyldimethylsiloxy-3,7,11-trimethyldodeca-6,10-dien-1-yn-3-ol **9**

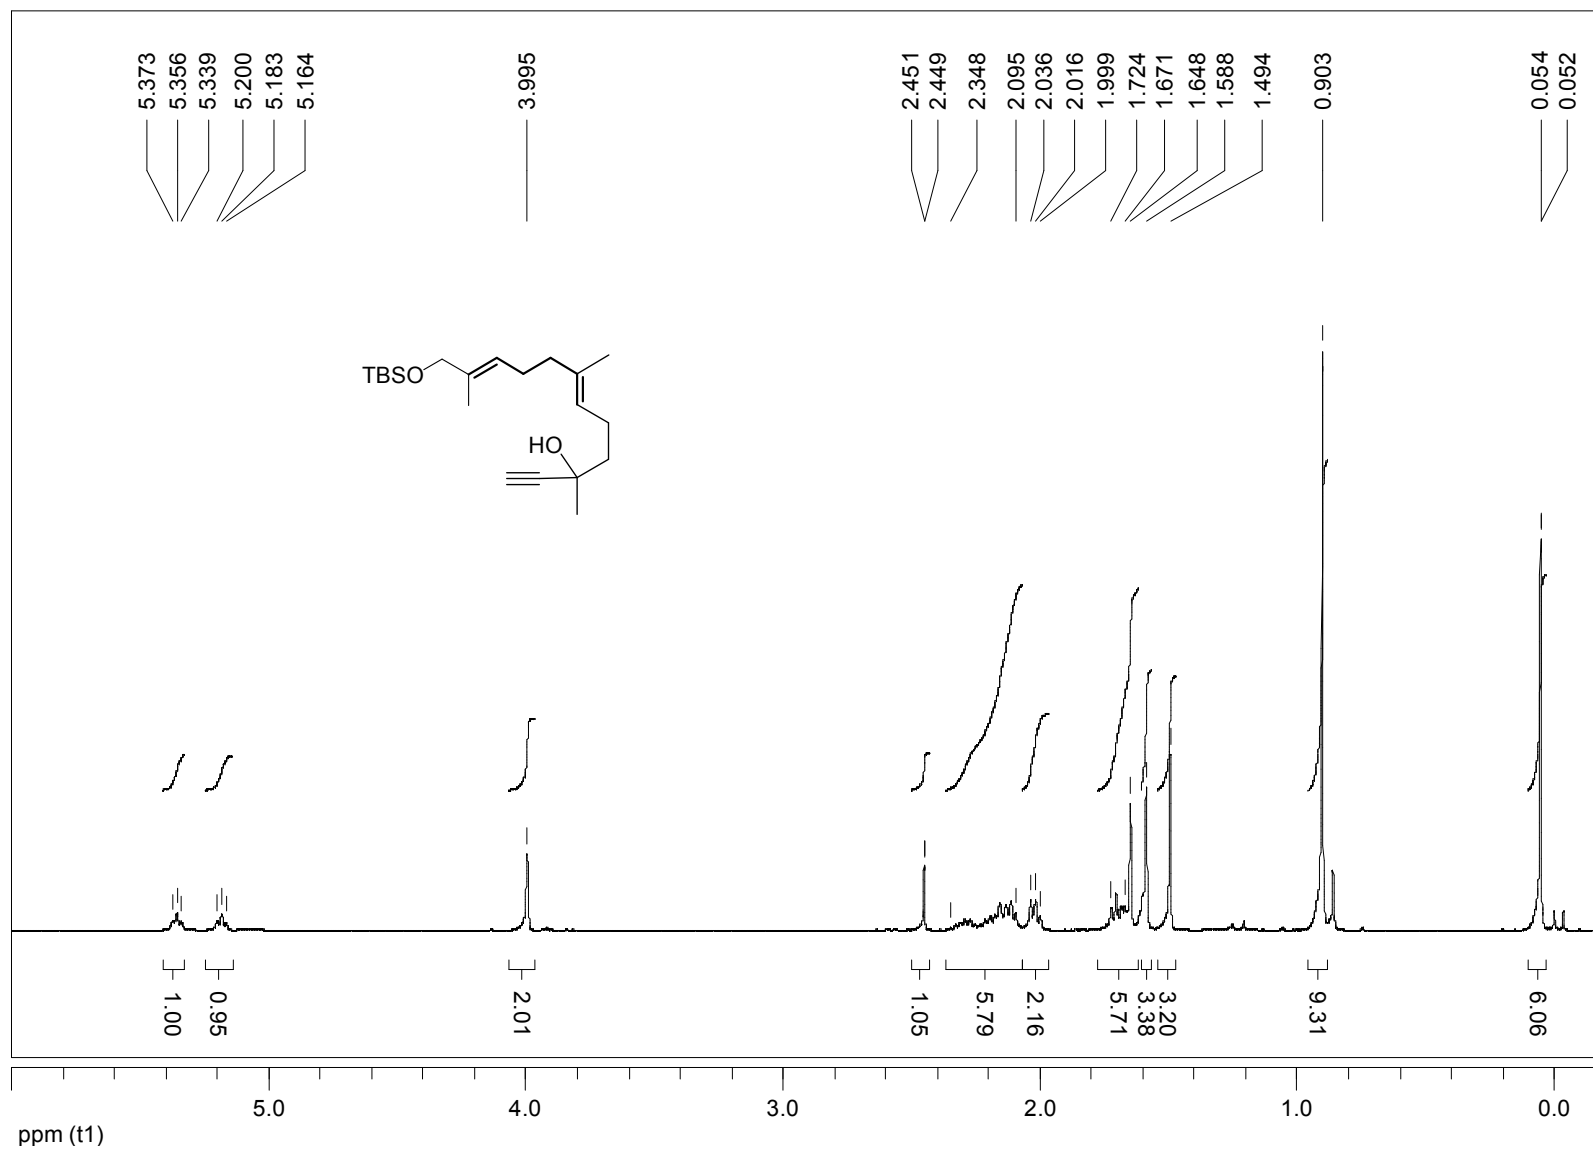

(6*E*,10*E*)-12-*tert*-Butyldimethylsiloxy-3,7,11-trimethyldodeca-6,10-dien-1-yn-3-ol **9**

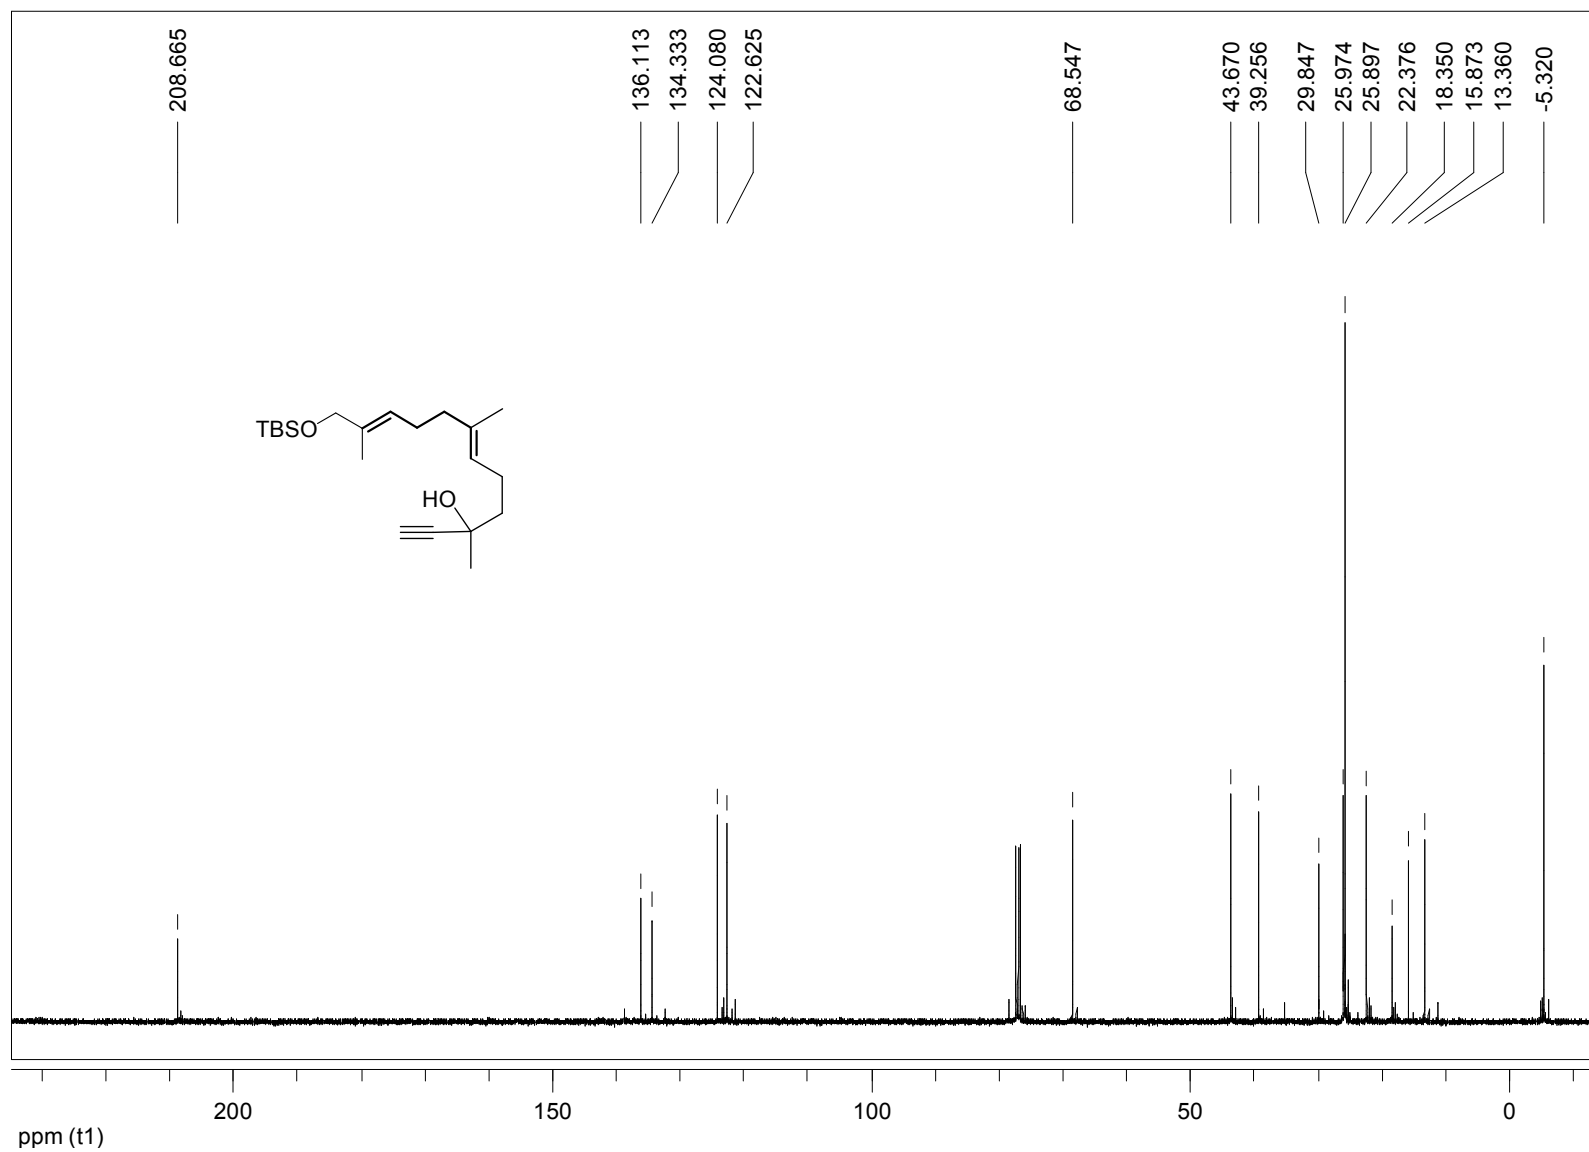

(6E,10E)-12-*tert*-Butyldimethylsiloxy-3,7,11-trimethyldodeca-6,10-dien-1-yn-3-ol methyl carbonate **10**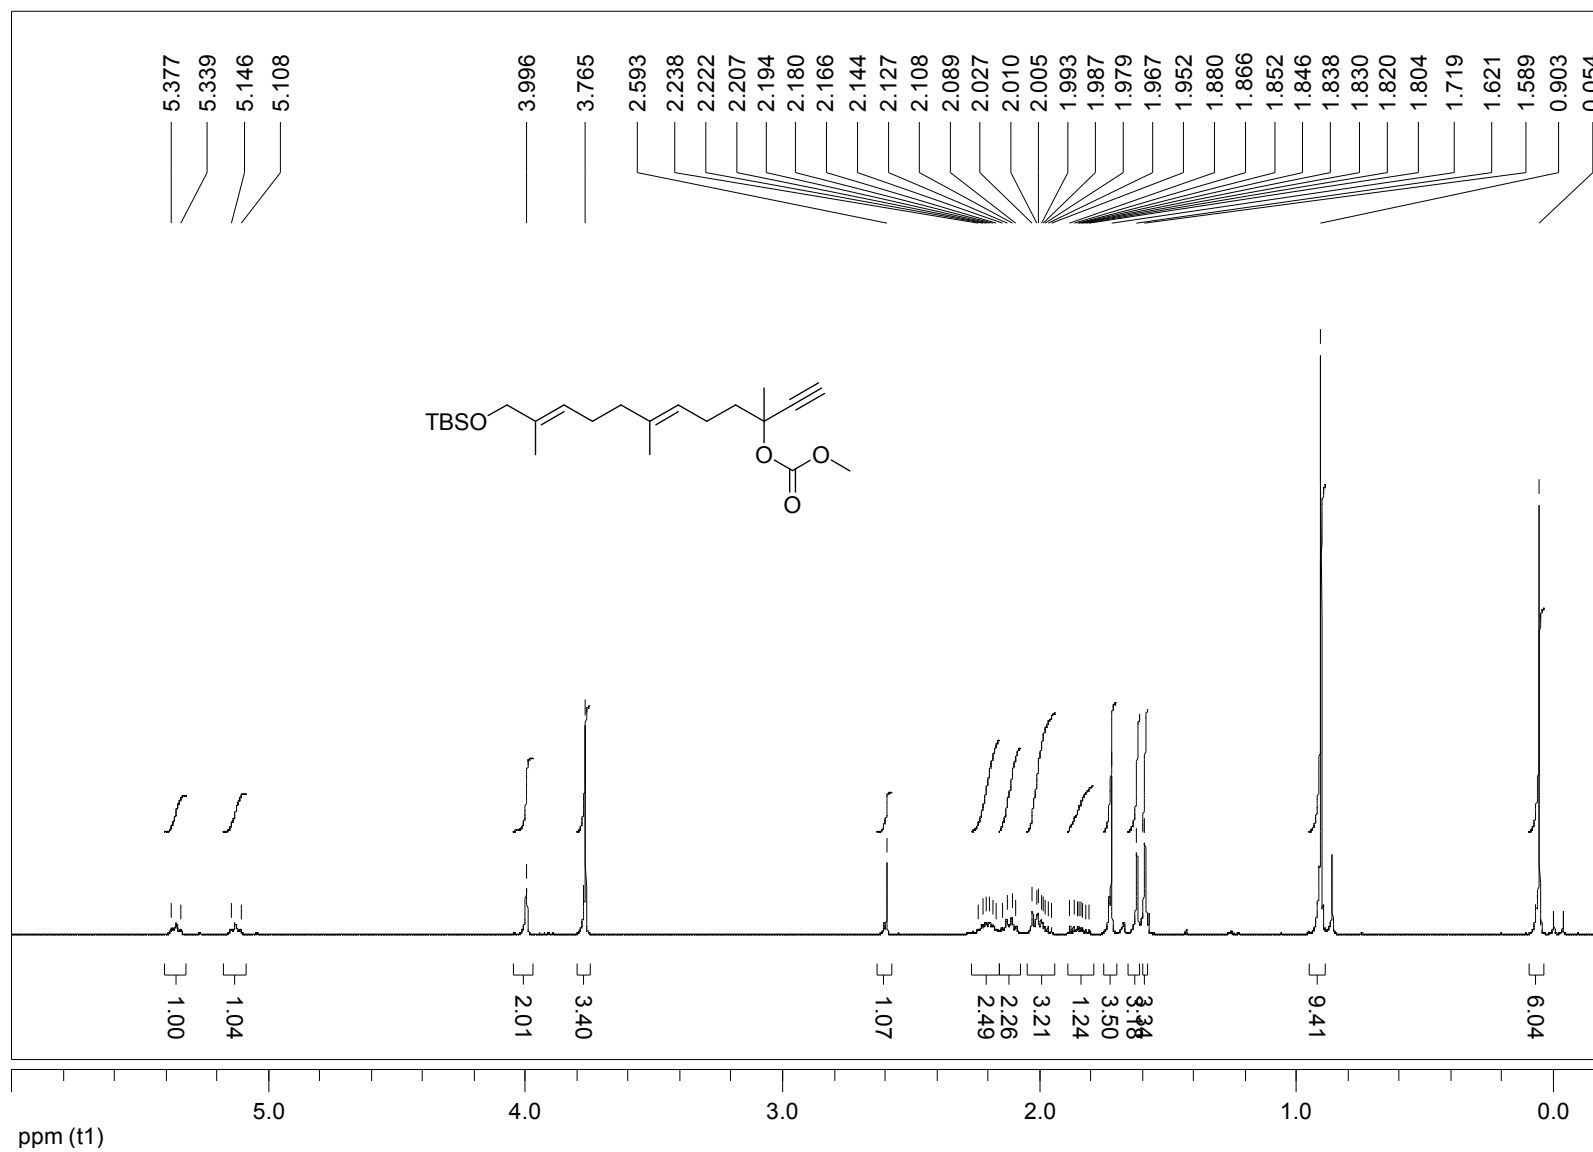

(6*E*,10*E*)-12-*tert*-Butyldimethylsiloxy-3,7,11-trimethyldodeca-6,10-dien-1-yn-3-ol methyl carbonate **10**

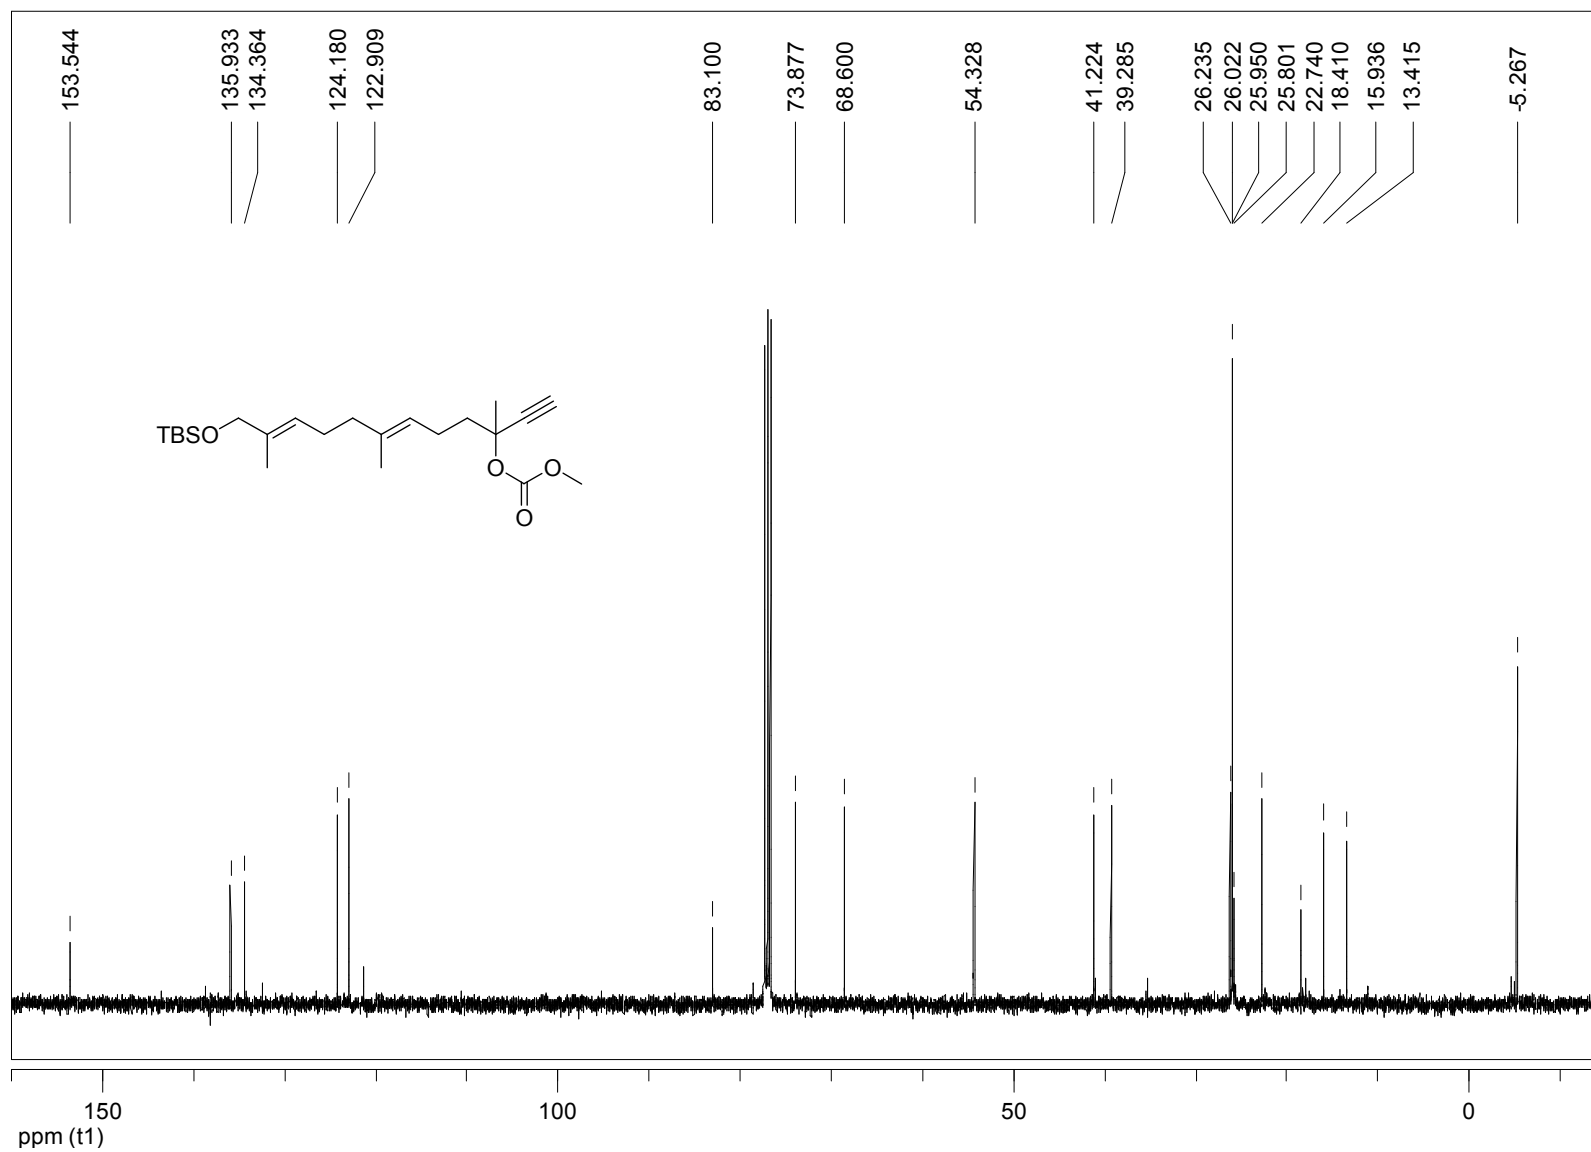

4-*tert*-Butyldimethylsilyloxy-3-methoxybenzaldehyde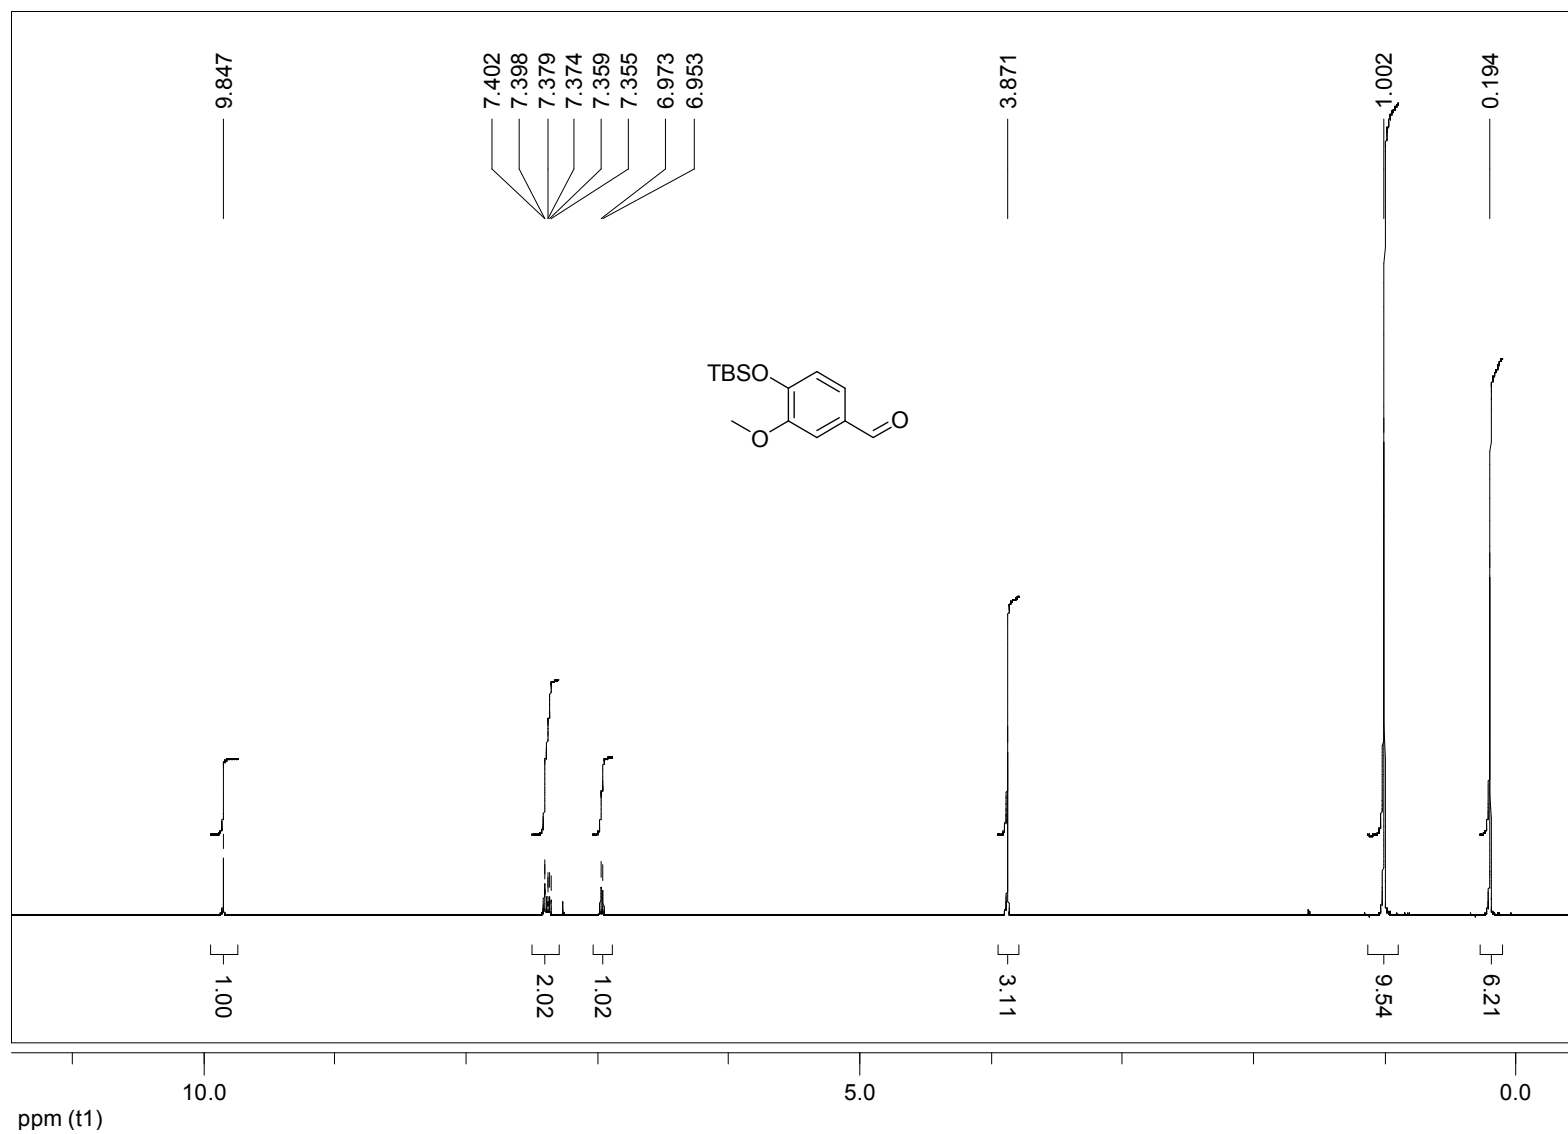



4-*tert*-Butyldimethylsilyloxy-3-methoxybenzaldehyde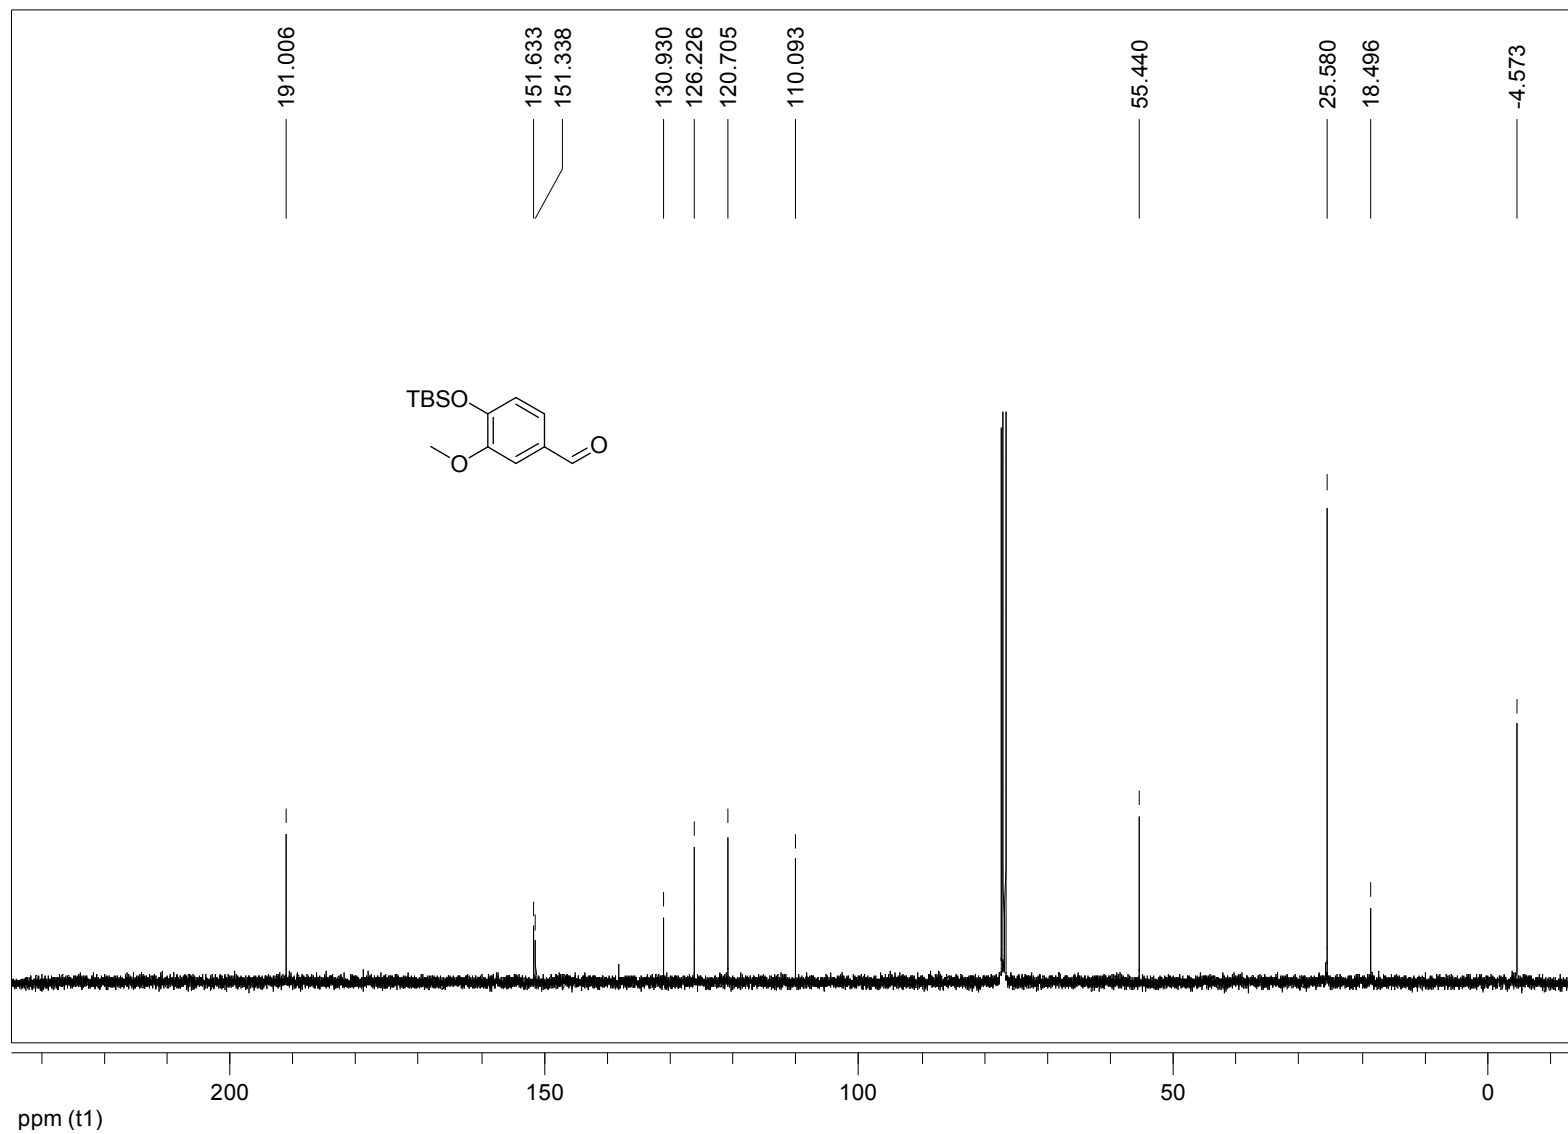

4-*tert*-Butyldimethylsiloxy-3-methoxyphenol **11**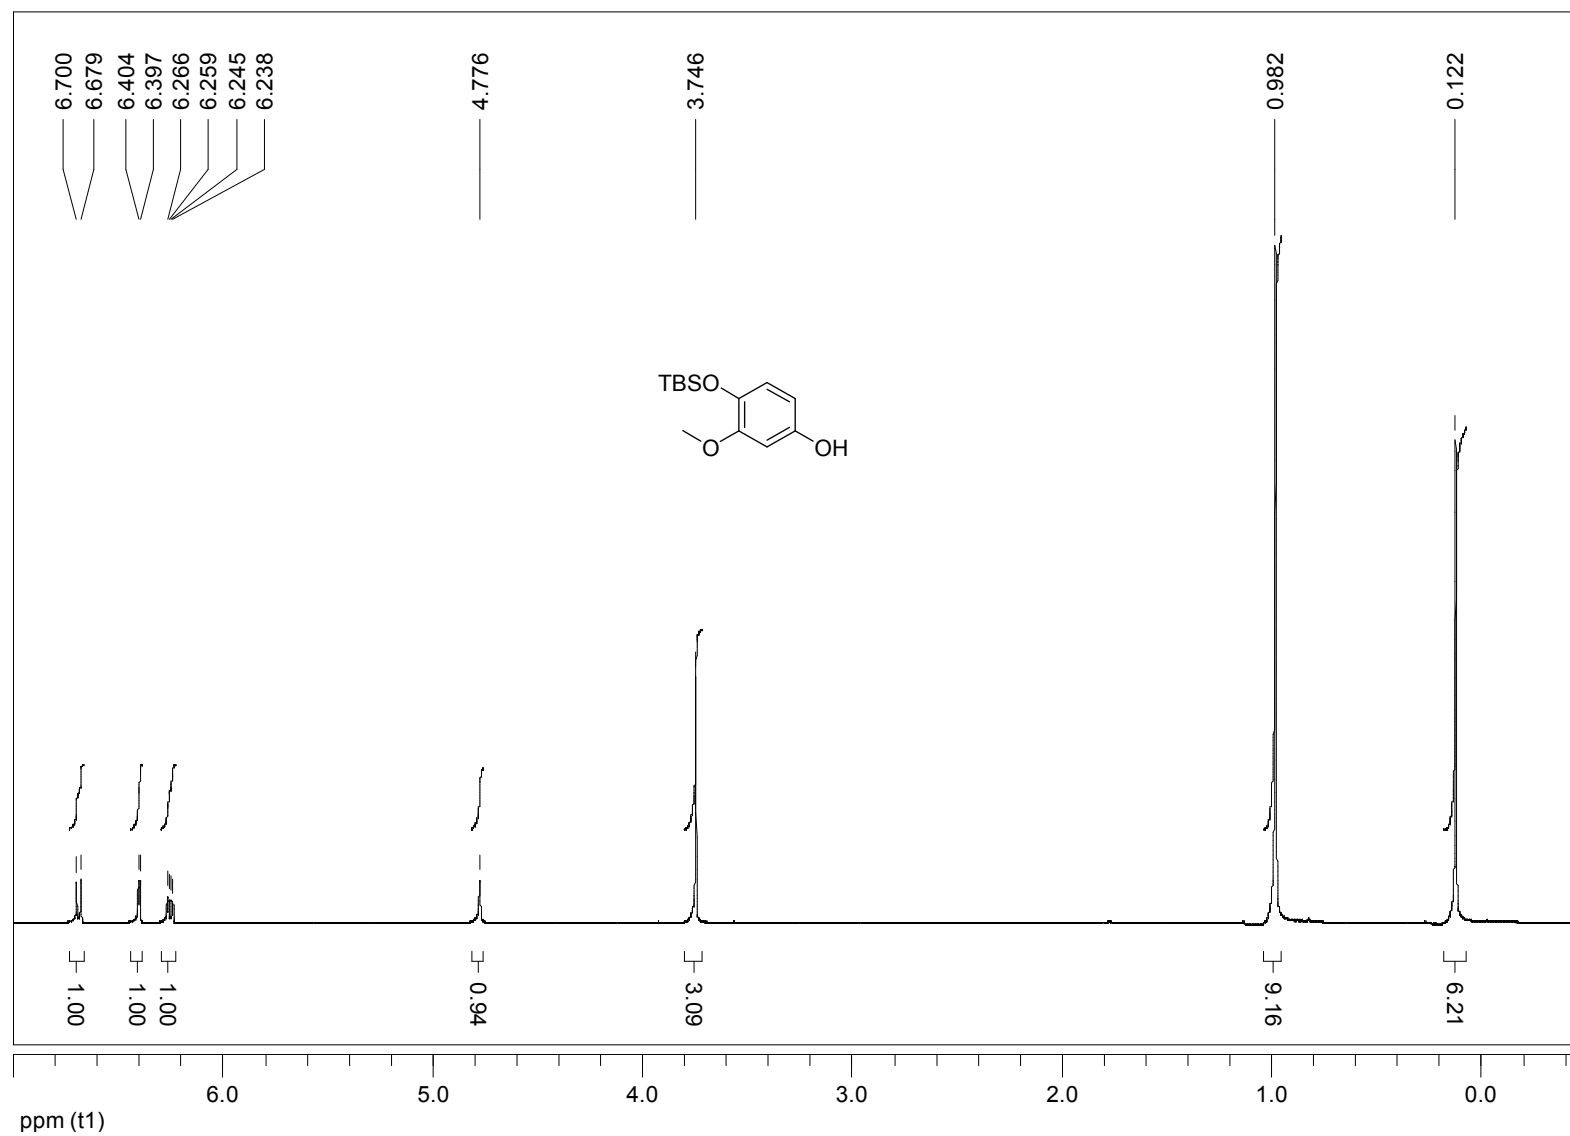

6.700  
6.679  
6.404  
6.397  
6.266  
6.259  
6.245  
6.238

4.776

3.746

0.982

0.122

1.00

1.00

1.00

0.94

3.09

9.16

6.21

ppm (t1)

4-*tert*-Butyldimethylsiloxy-3-methoxyphenol **11**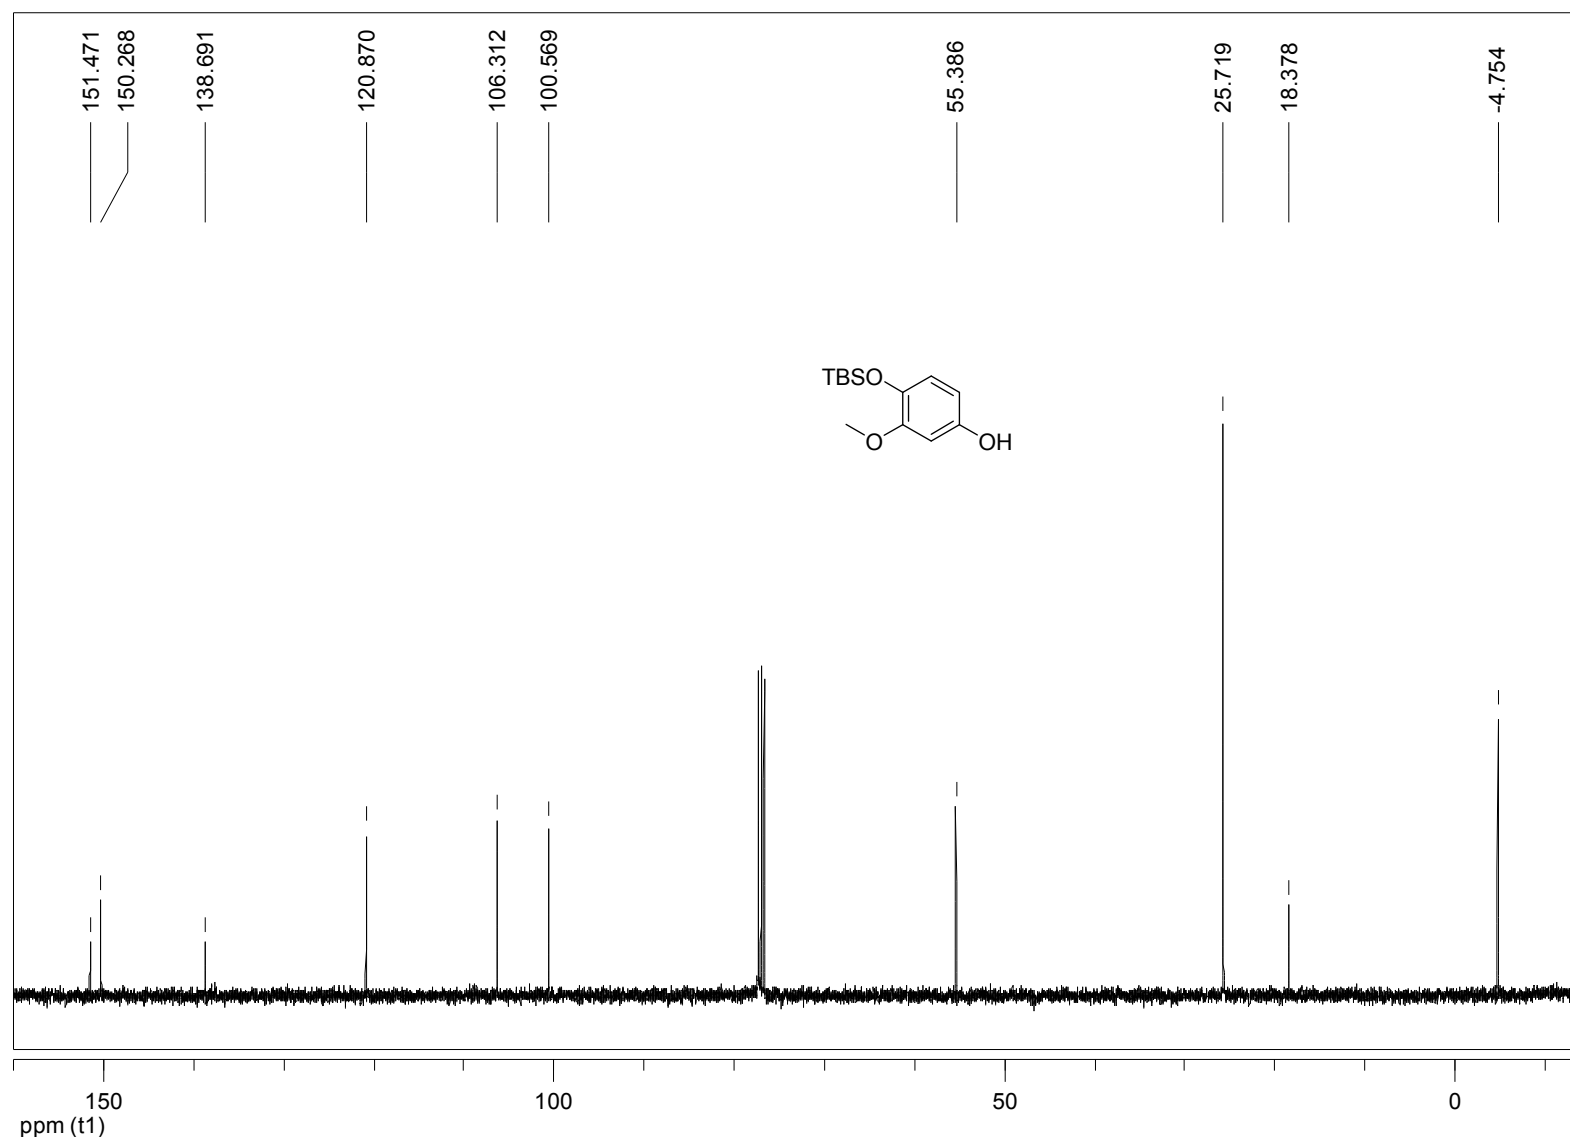

1-*tert*-Butyldimethylsiloxy-4-[(6'*E*,10'*E*)-12'-*tert*-butyldimethylsiloxy-3',7',11'-tri-methyldodeca-6',10'-dien-1'-yn-3'-yloxy]-2-methoxybenzene **12**

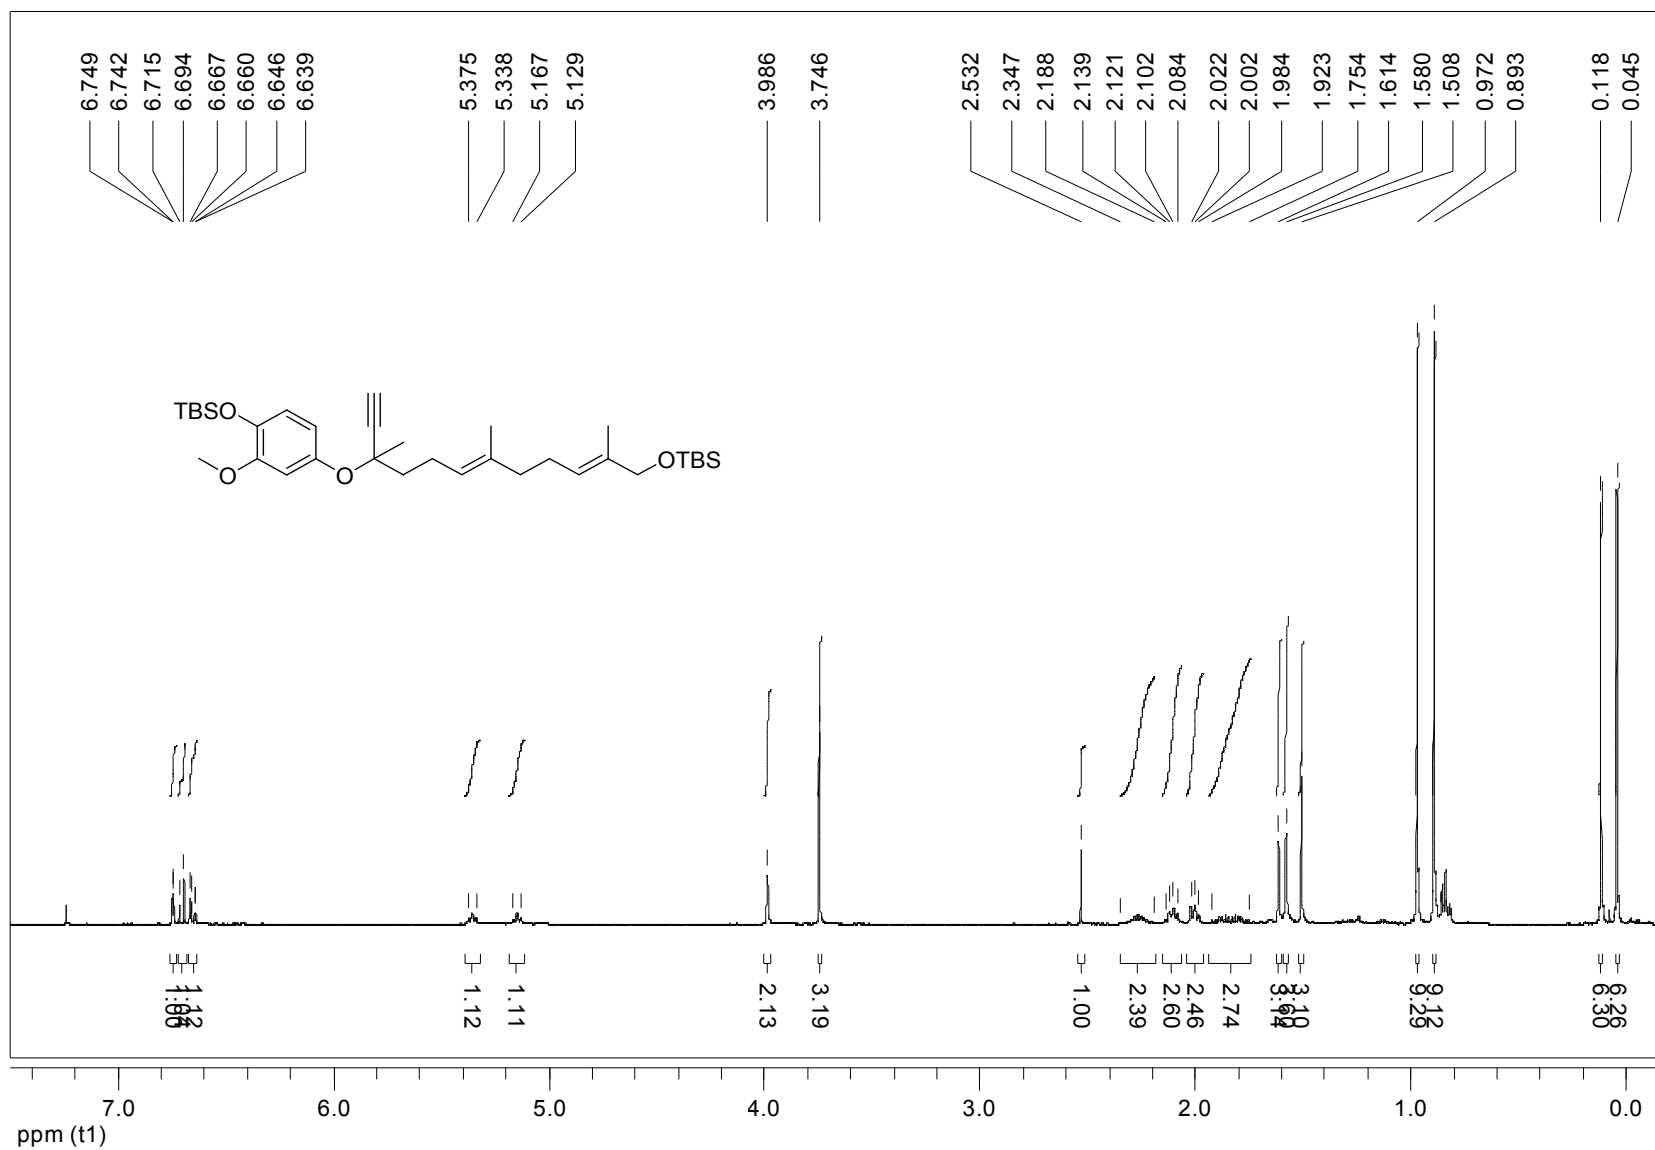

1-*tert*-Butyldimethylsiloxy-4-[(6'*E*,10'*E*)-12'-*tert*-butyldimethylsiloxy-3',7',11'-tri-methyldodeca-6',10'-dien-1'-yn-3'-yloxy]-2-methoxybenzene **12**

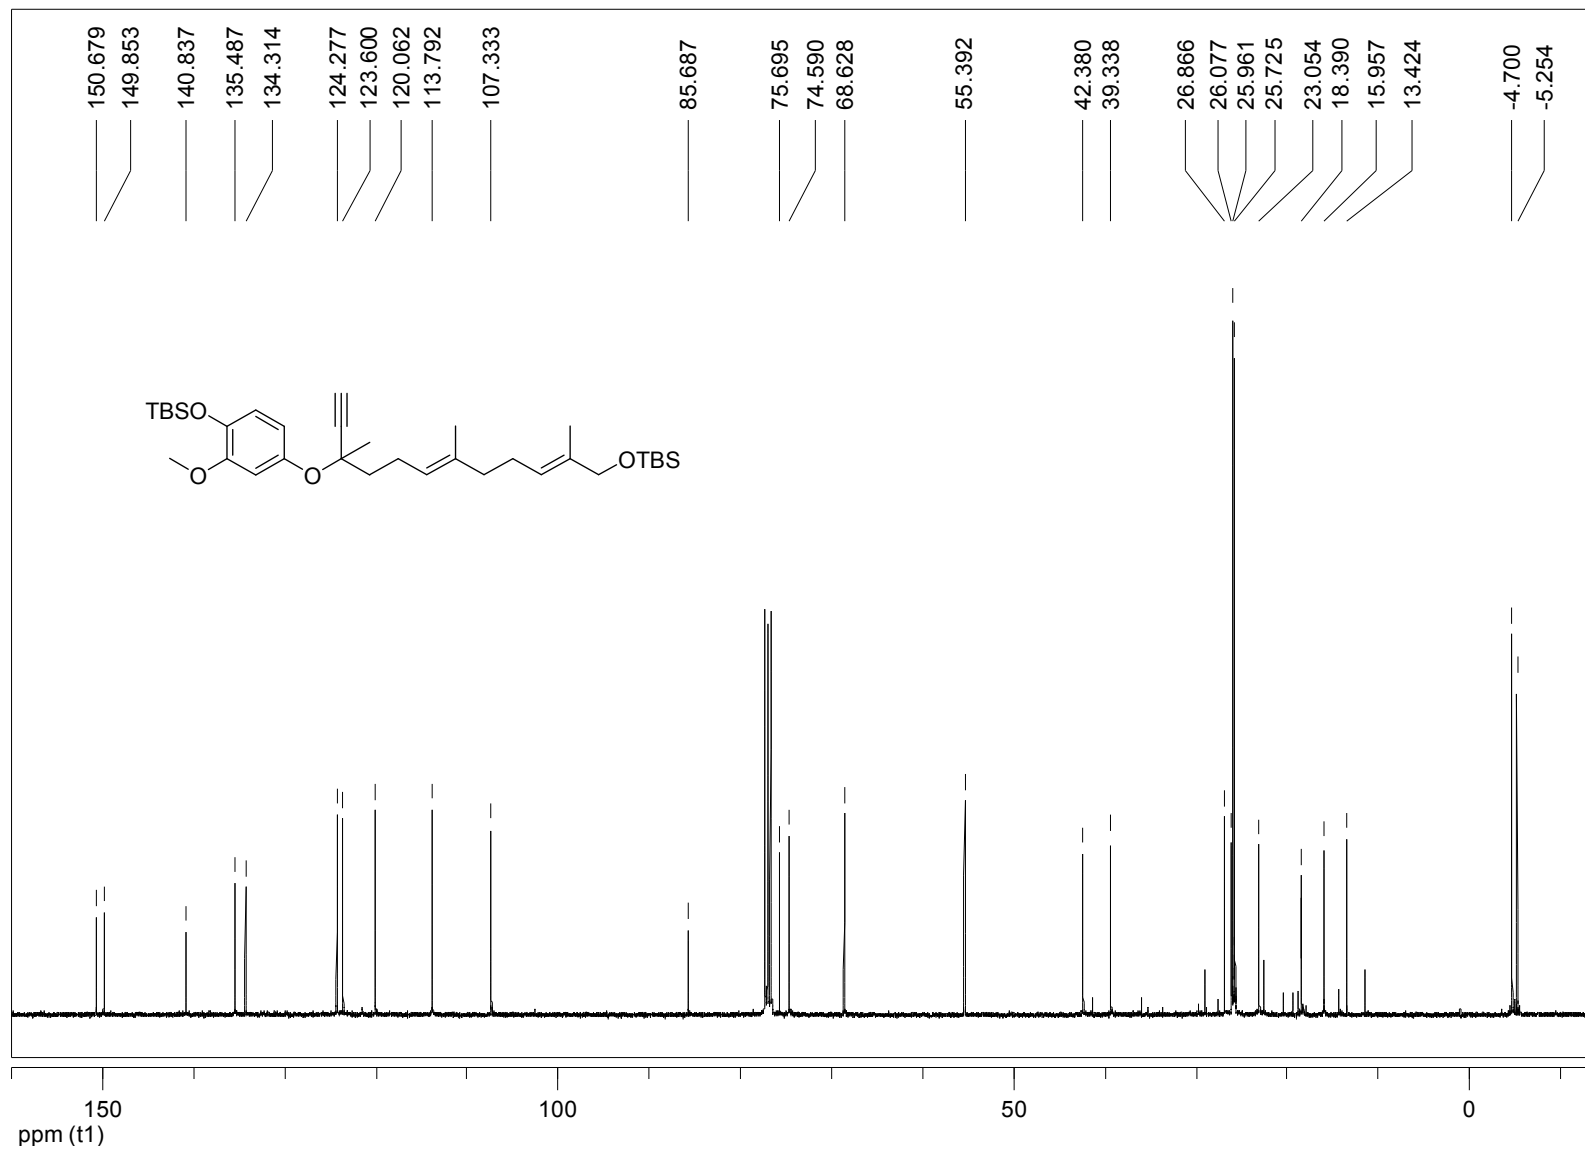

6-*tert*-Butyldimethylsilyl-2-[(3'*E*,7'*E*)-9'-*tert*-butyldimethylsilyloxy-4',8'-dimethyl-nona-3',7'-dienyl]-7-methoxy-2-methyl-2*H*-chromen-6-ol **13**

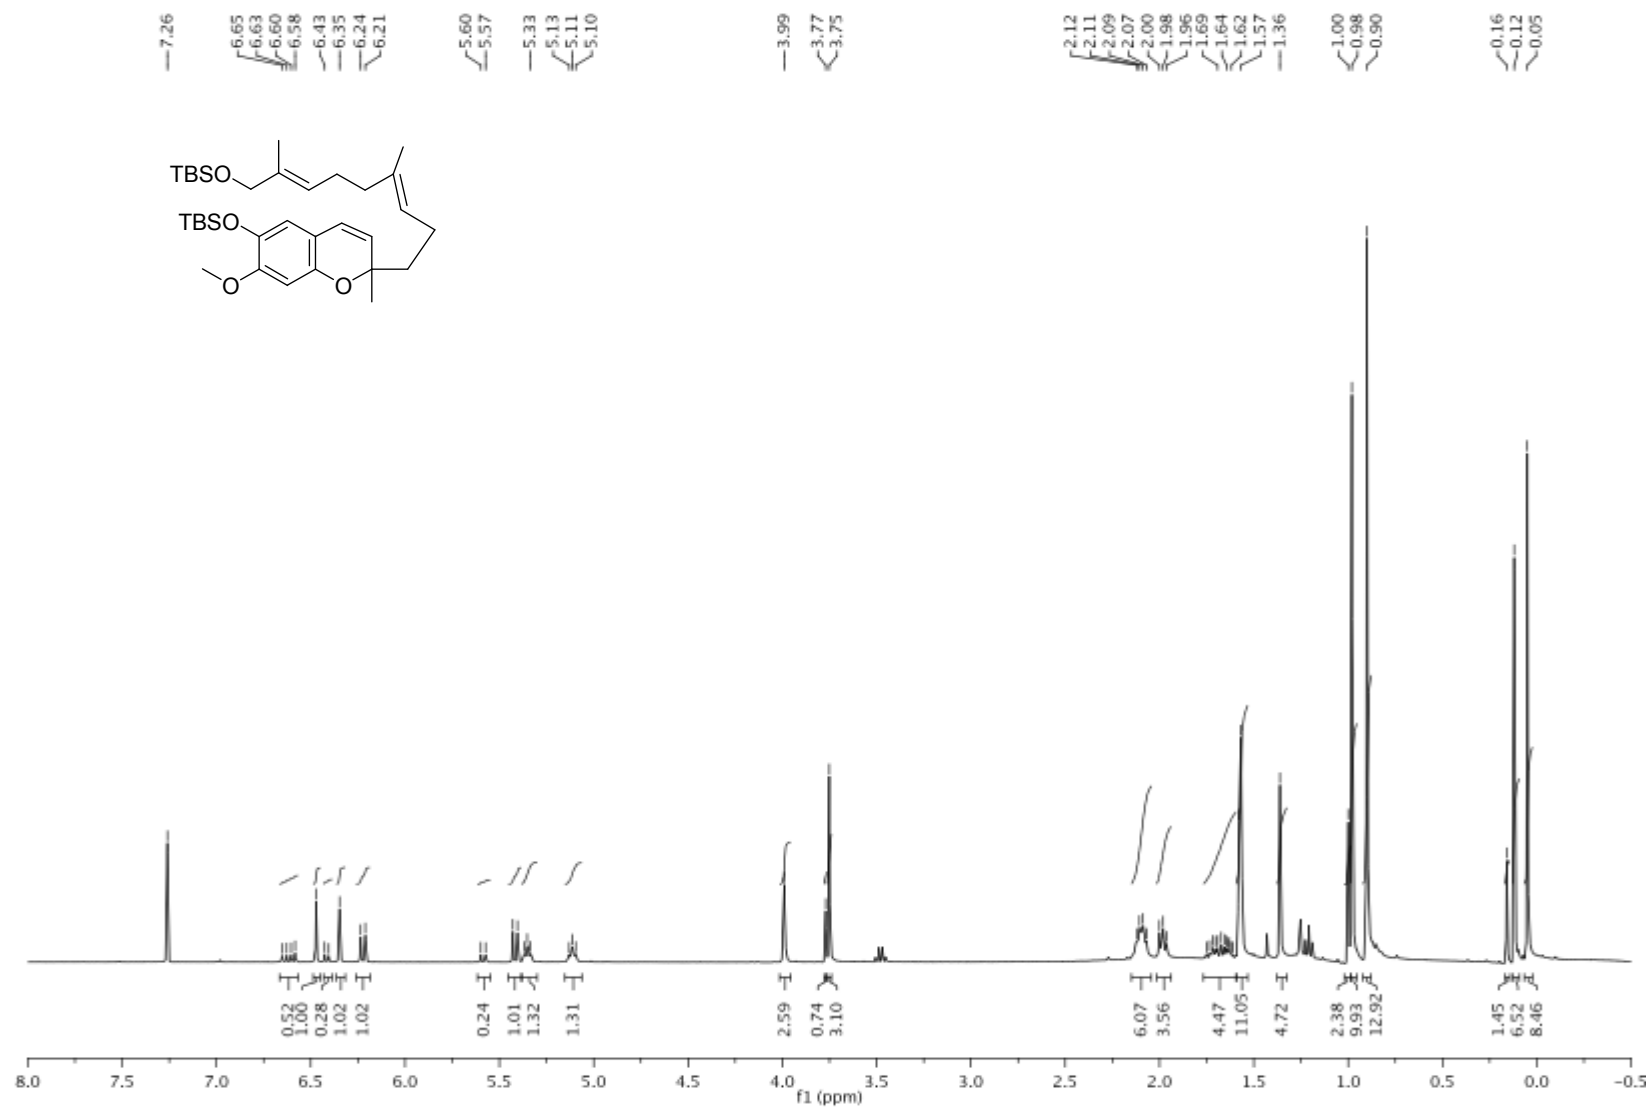

6-*tert*-Butyldimethylsilyl-2-[(3'*E*,7'*E*)-9'-*tert*-butyldimethylsilyloxy-4',8'-dimethyl-nona-3',7'-dienyl]-7-methoxy-2-methyl-2*H*-chromen-6-ol **13**

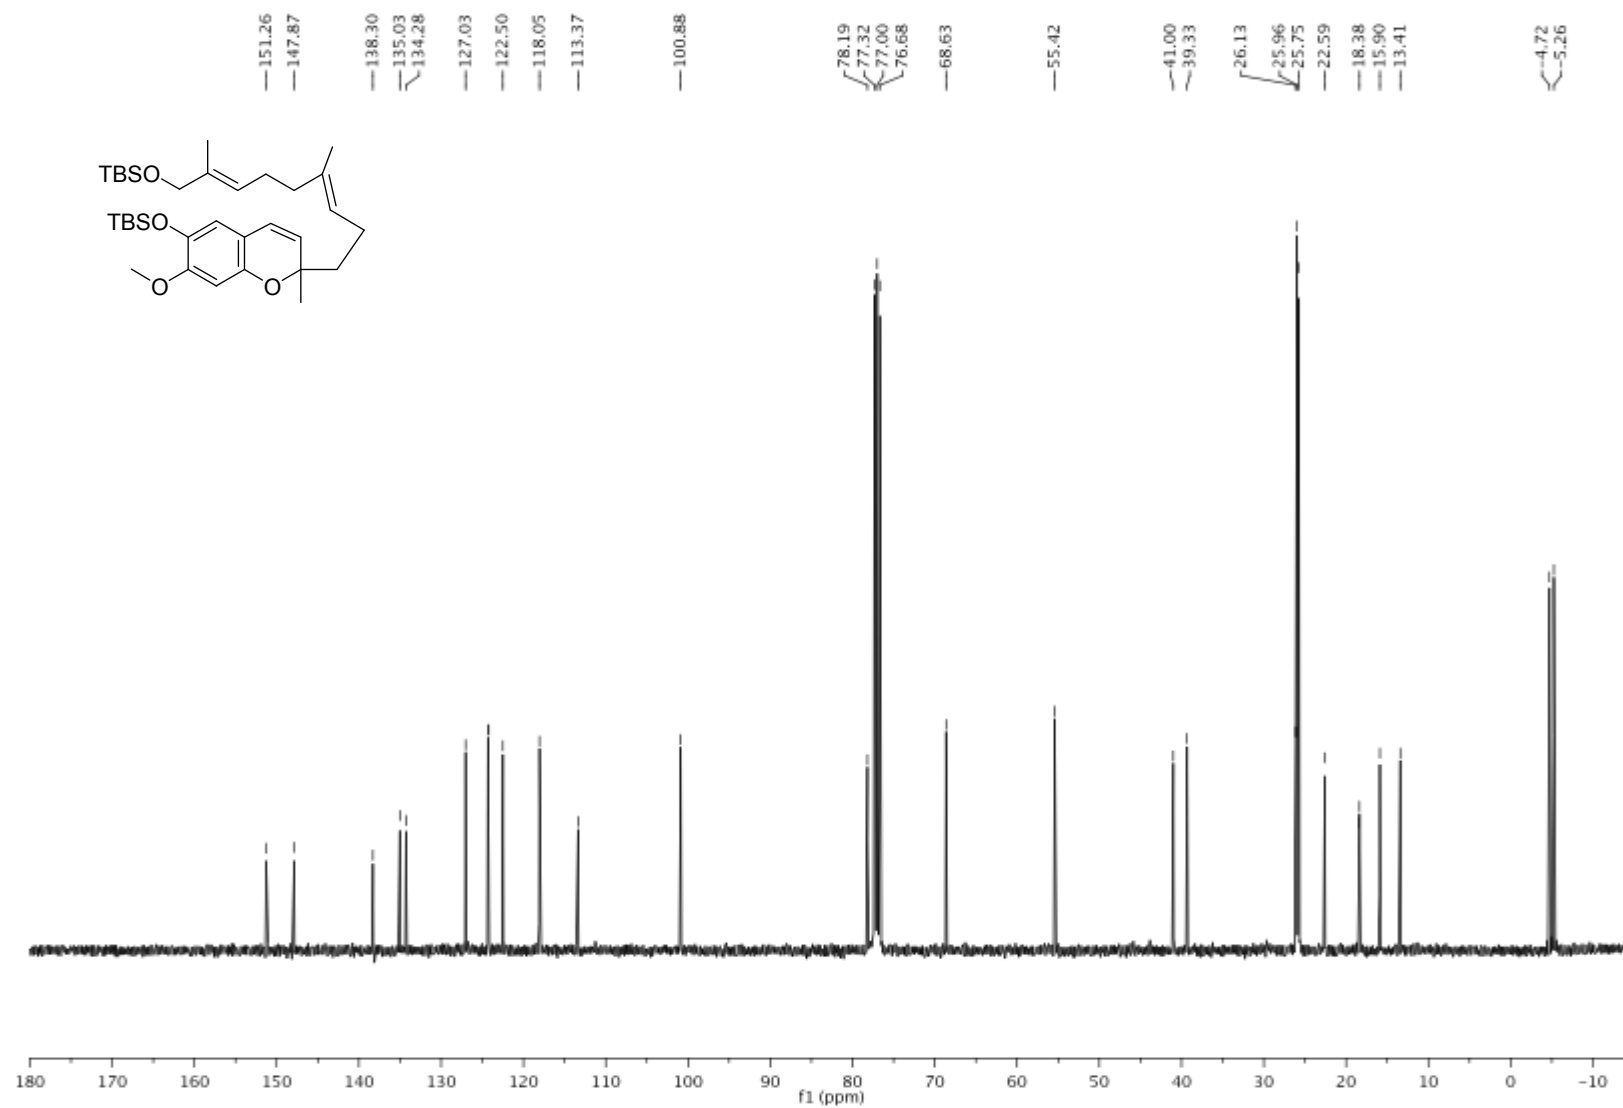

## 4-Hydroxy-3-methoxyphenyl formate

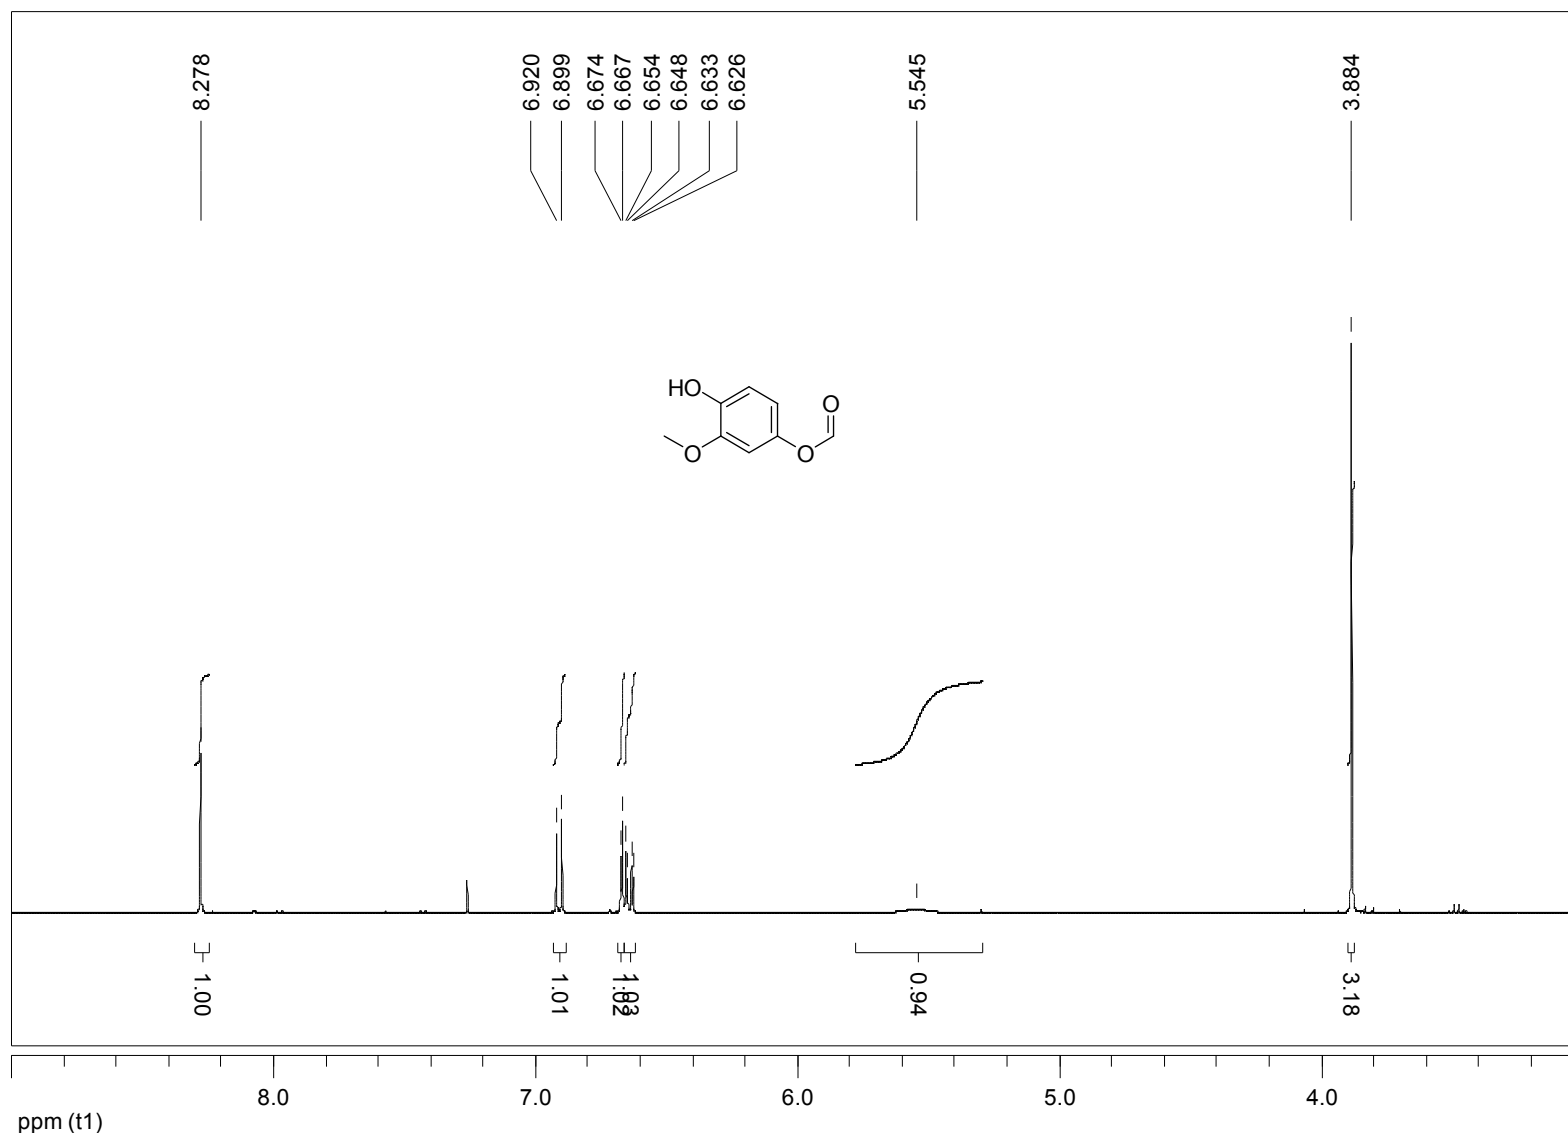



## 4-Hydroxy-3-methoxyphenyl formate

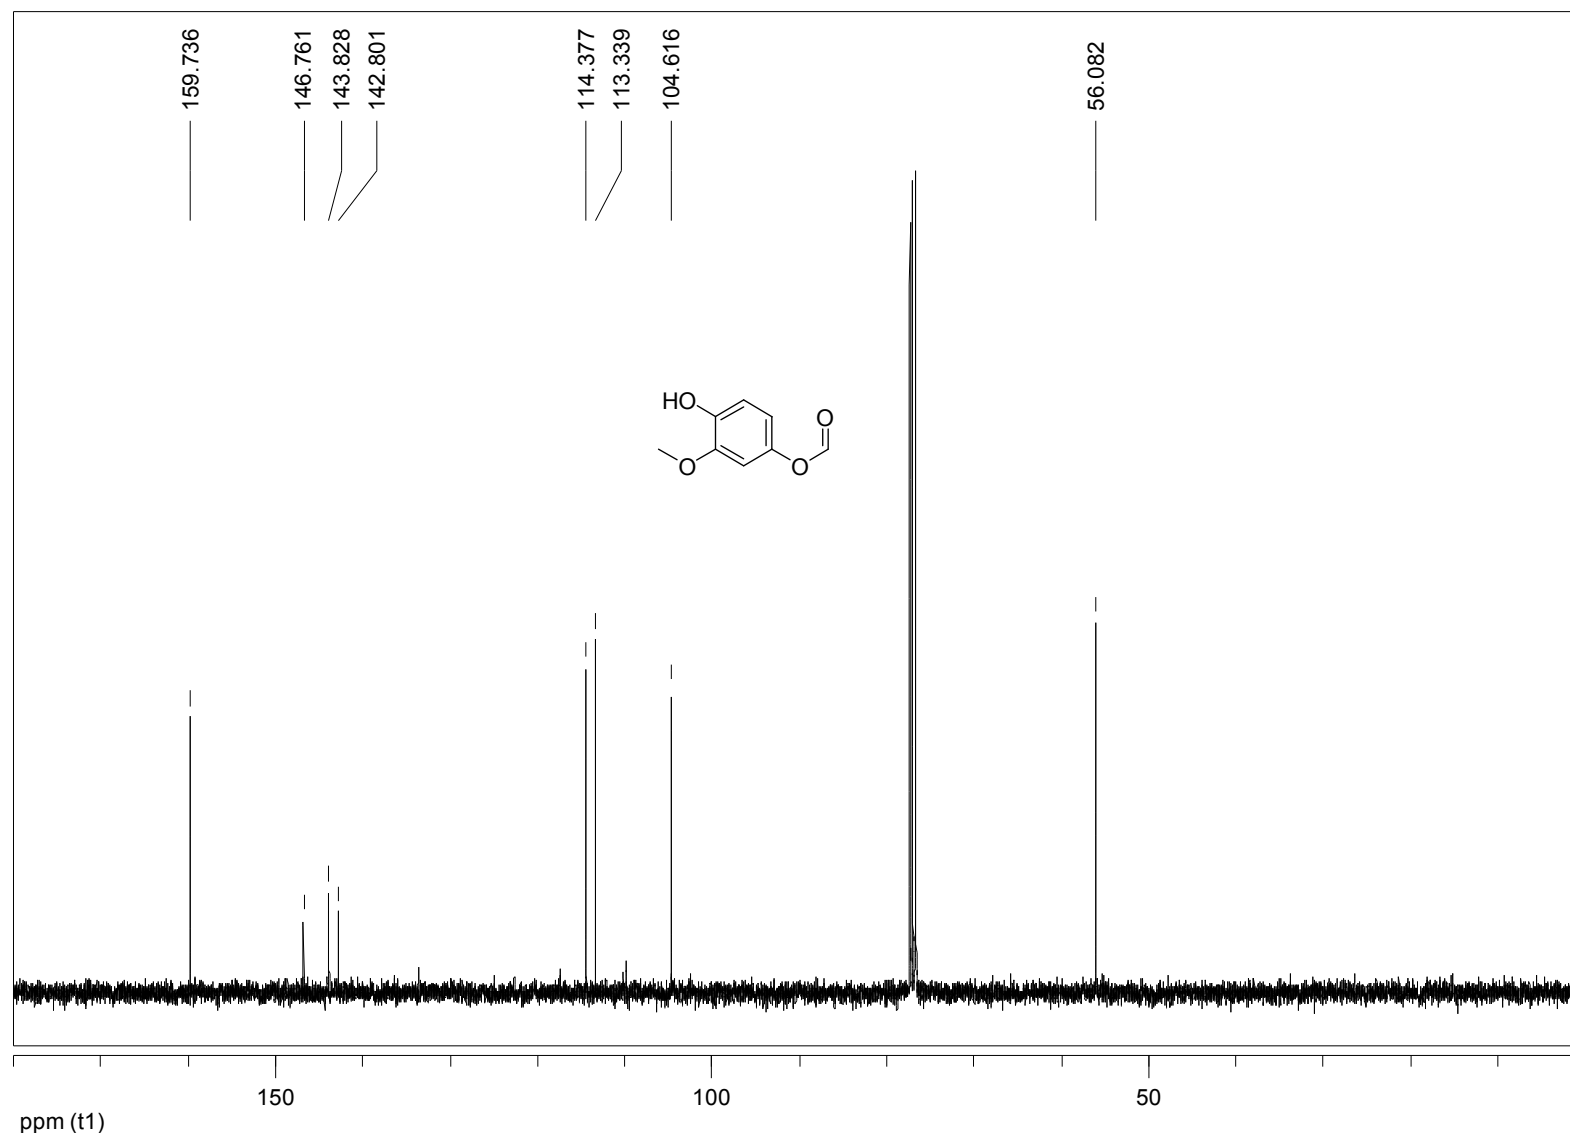

4-Methanesulfonyloxy-3-methoxyphenol **14**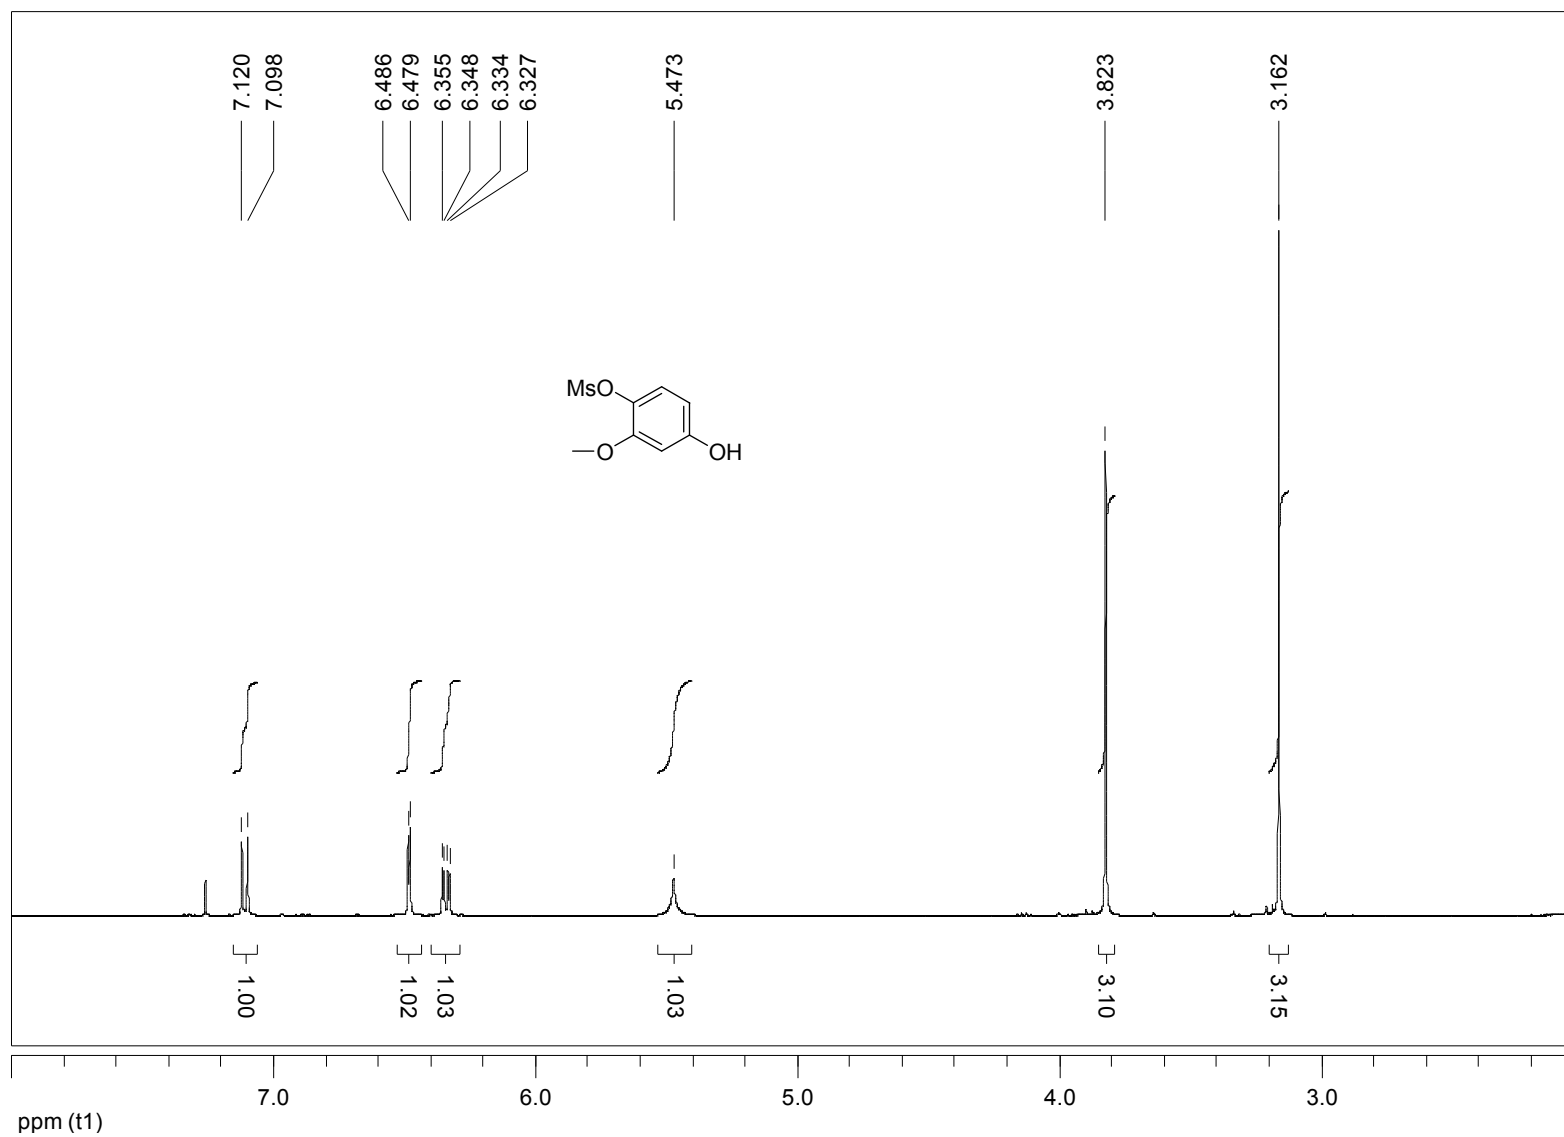

4-Methanesulfonyloxy-3-methoxyphenol **14**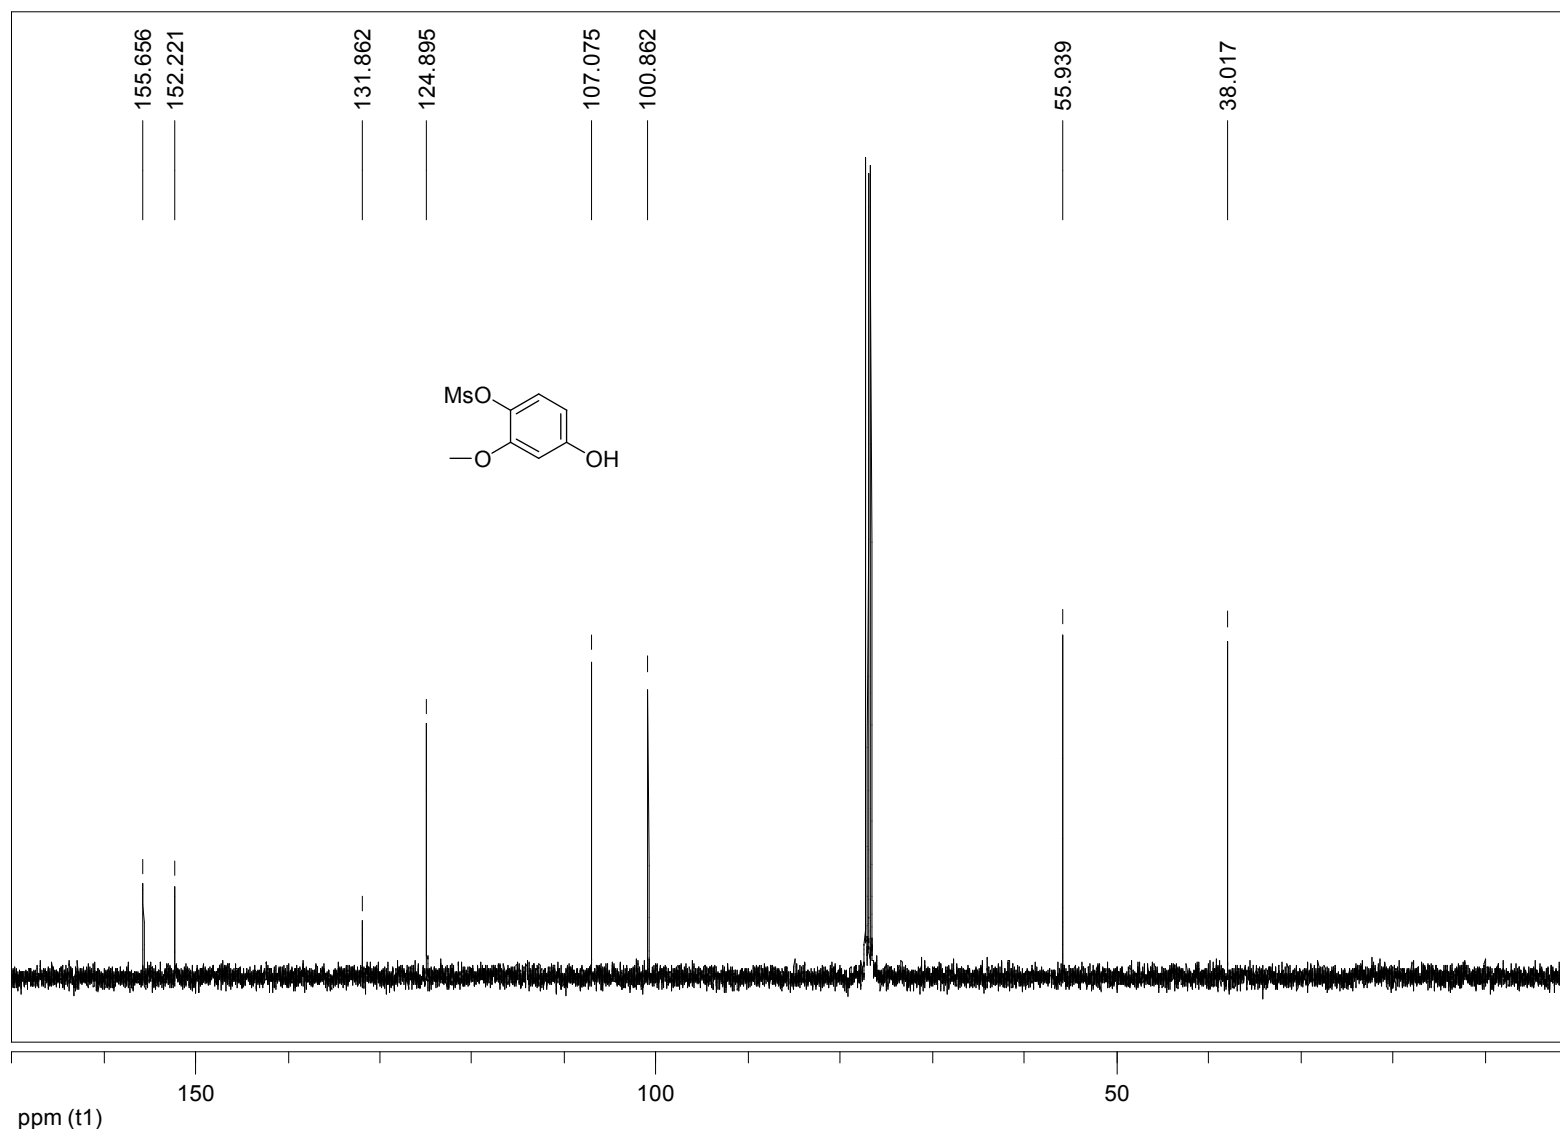



4-Methanesulfonyloxy-3-methoxy-((6'*E*,10'*E*)-12'-*tert*-butyldimethylsiloxy-3',7',11'-trimethyldodeca-6',10'-dien-1'-yn-3'-yloxy) benzene **15**

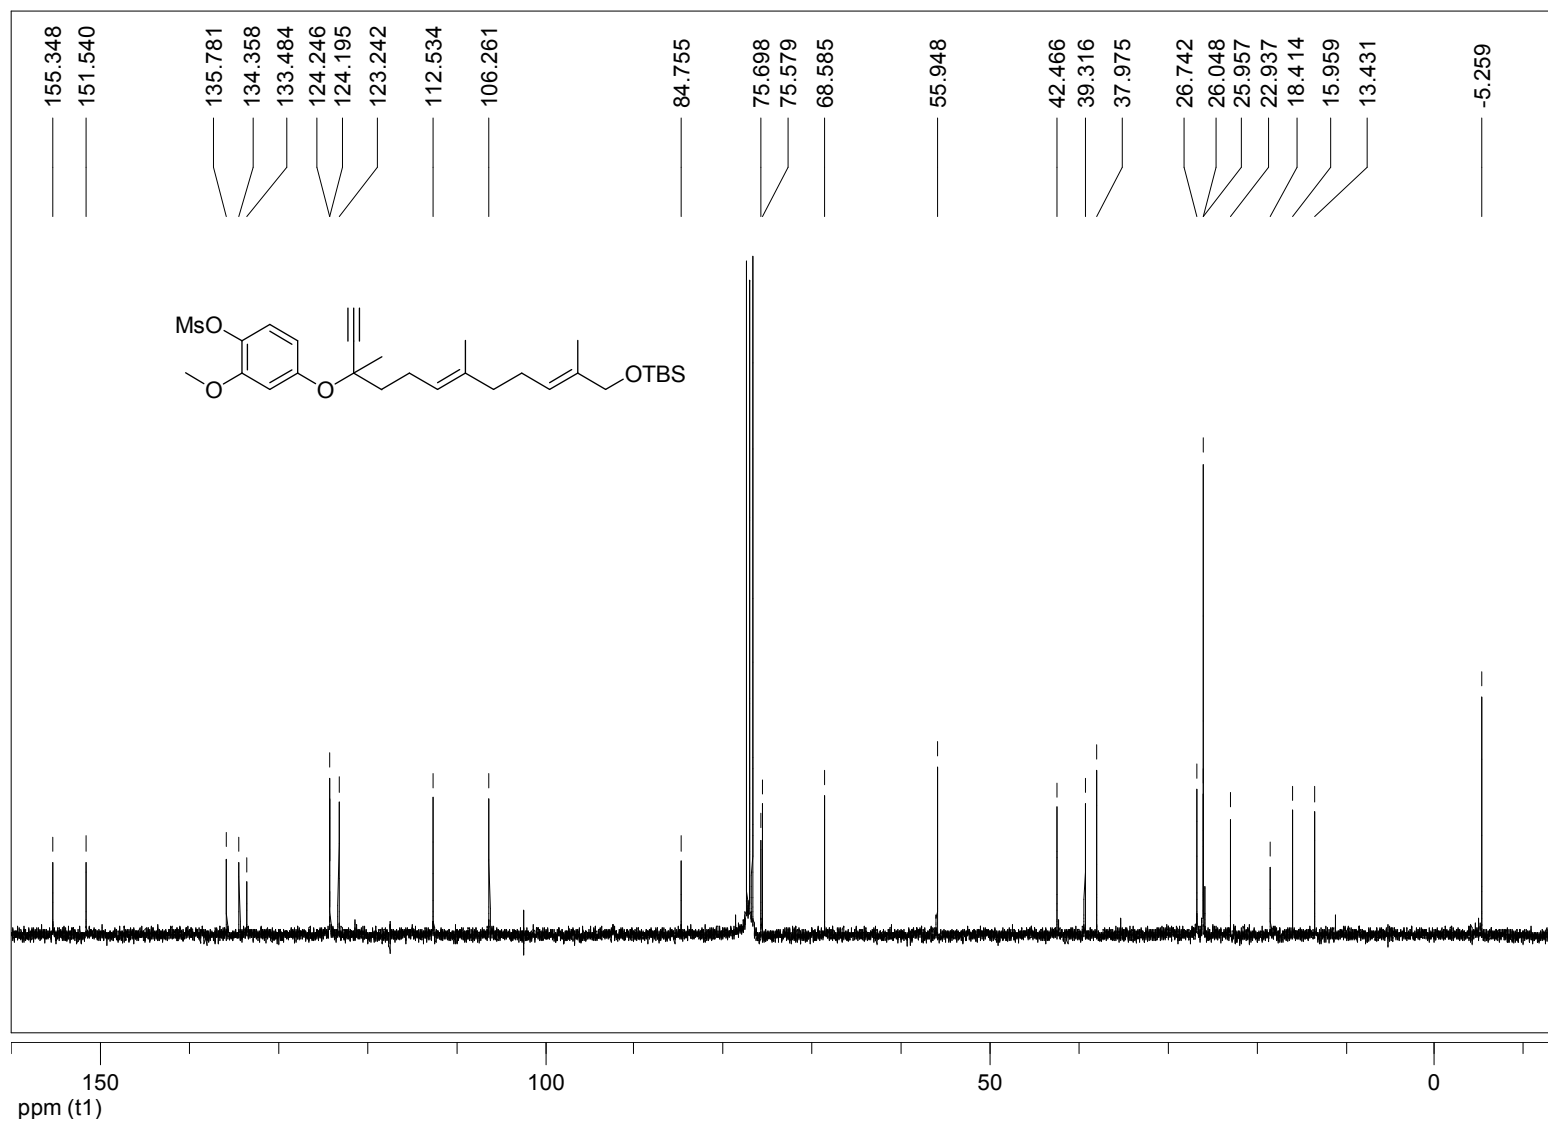

4-[(6'*E*,10'*E*)-12'-*tert*-butyldimethylsiloxy-3',7',11'-trimethyldodeca-6',10'-dien-1'-yn-3'-yloxy]-2-methoxyphenol **16**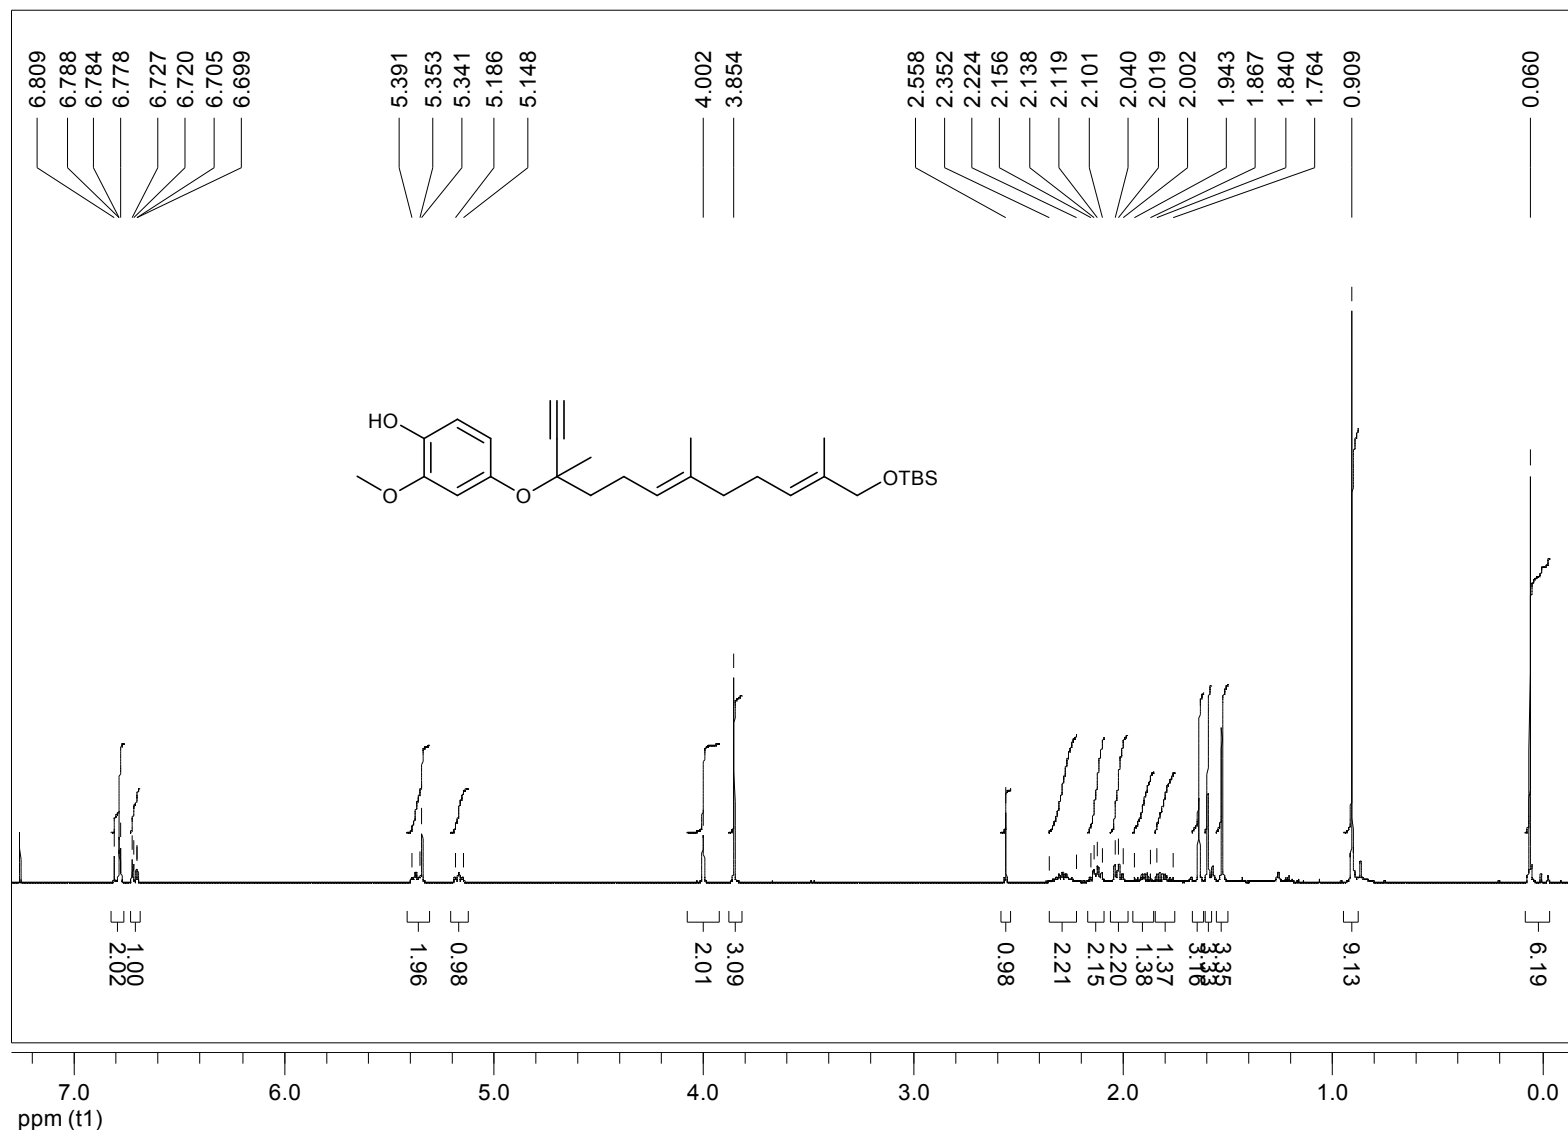

4-[(6'*E*,10'*E*)-12'-*tert*-butyldimethylsiloxy-3',7',11'-trimethyldodeca-6',10'-dien-1'-yn-3'-yloxy]-2-methoxyphenol **16**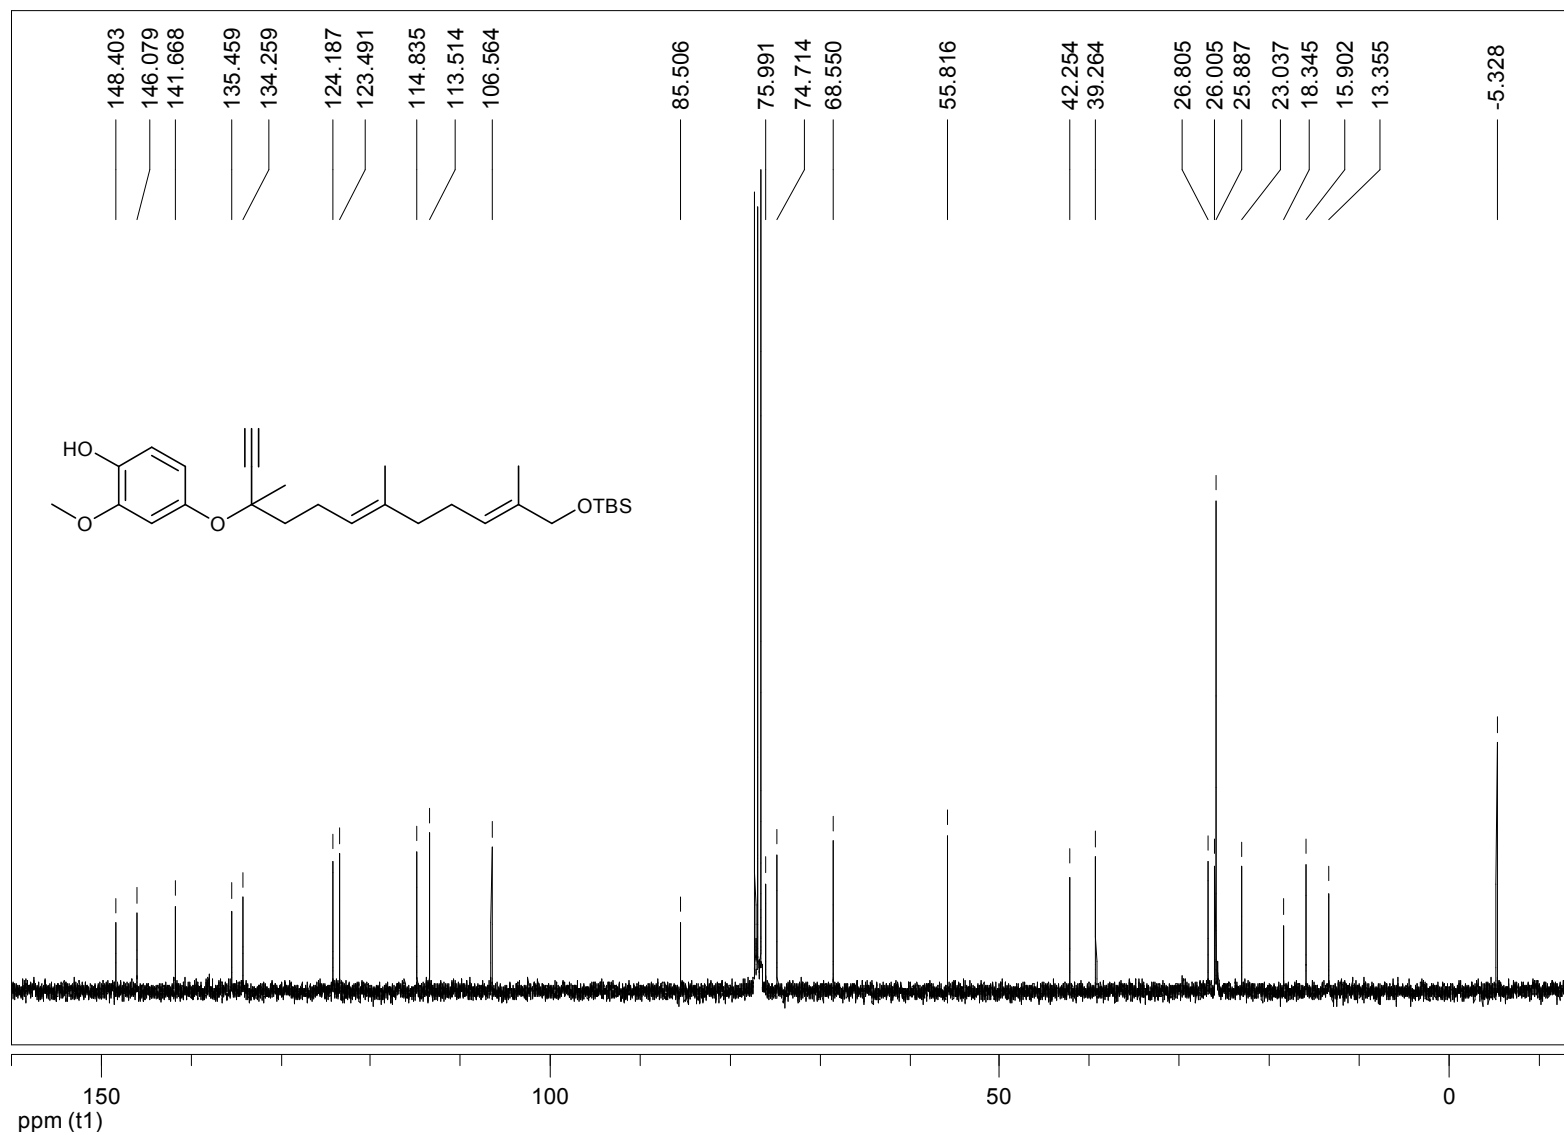

2-[(3'E,7'E)-9'-tert-Butyldimethylsiloxy-4',8'-dimethylnona-3',7'-dienyl]-7-methoxy-2-methyl-2H-chromen-6-ol **17**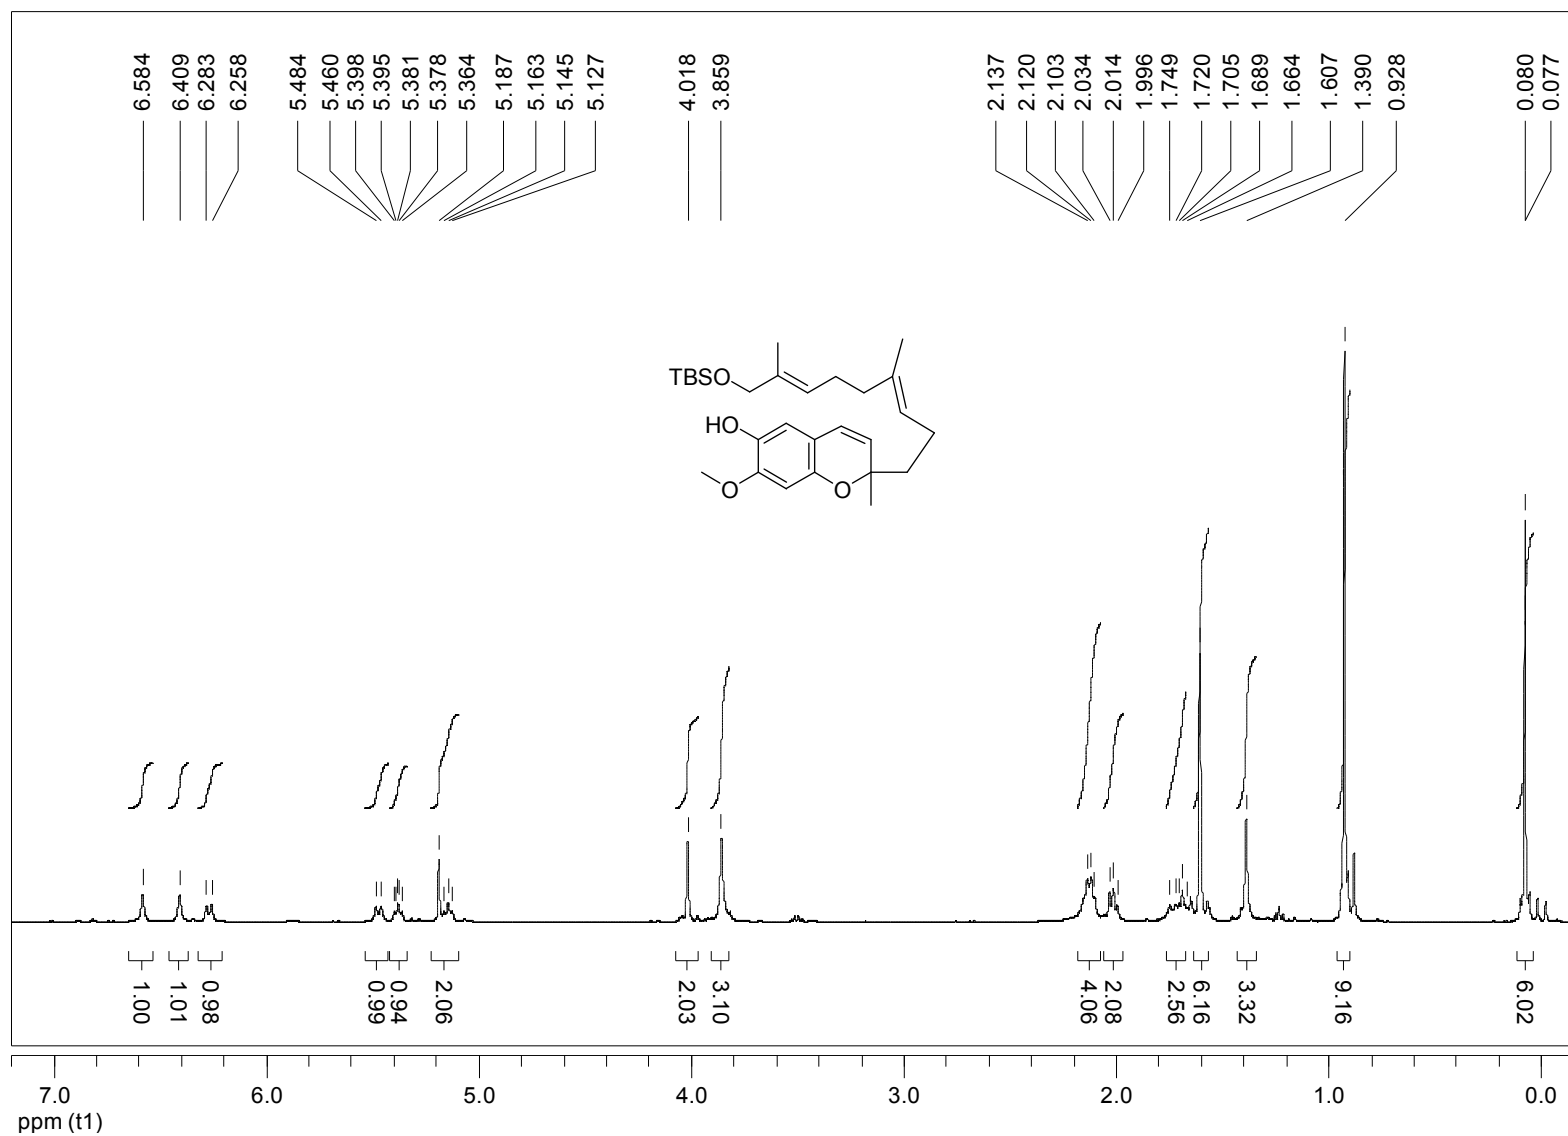



## 2-[(3'E,7'E)-9'-tert-Butyldimethylsiloxy-4',8'-dimethylnona-3',7'-dienyl]-7-methoxy-2-methyl-2H-chromen-6-ol 17

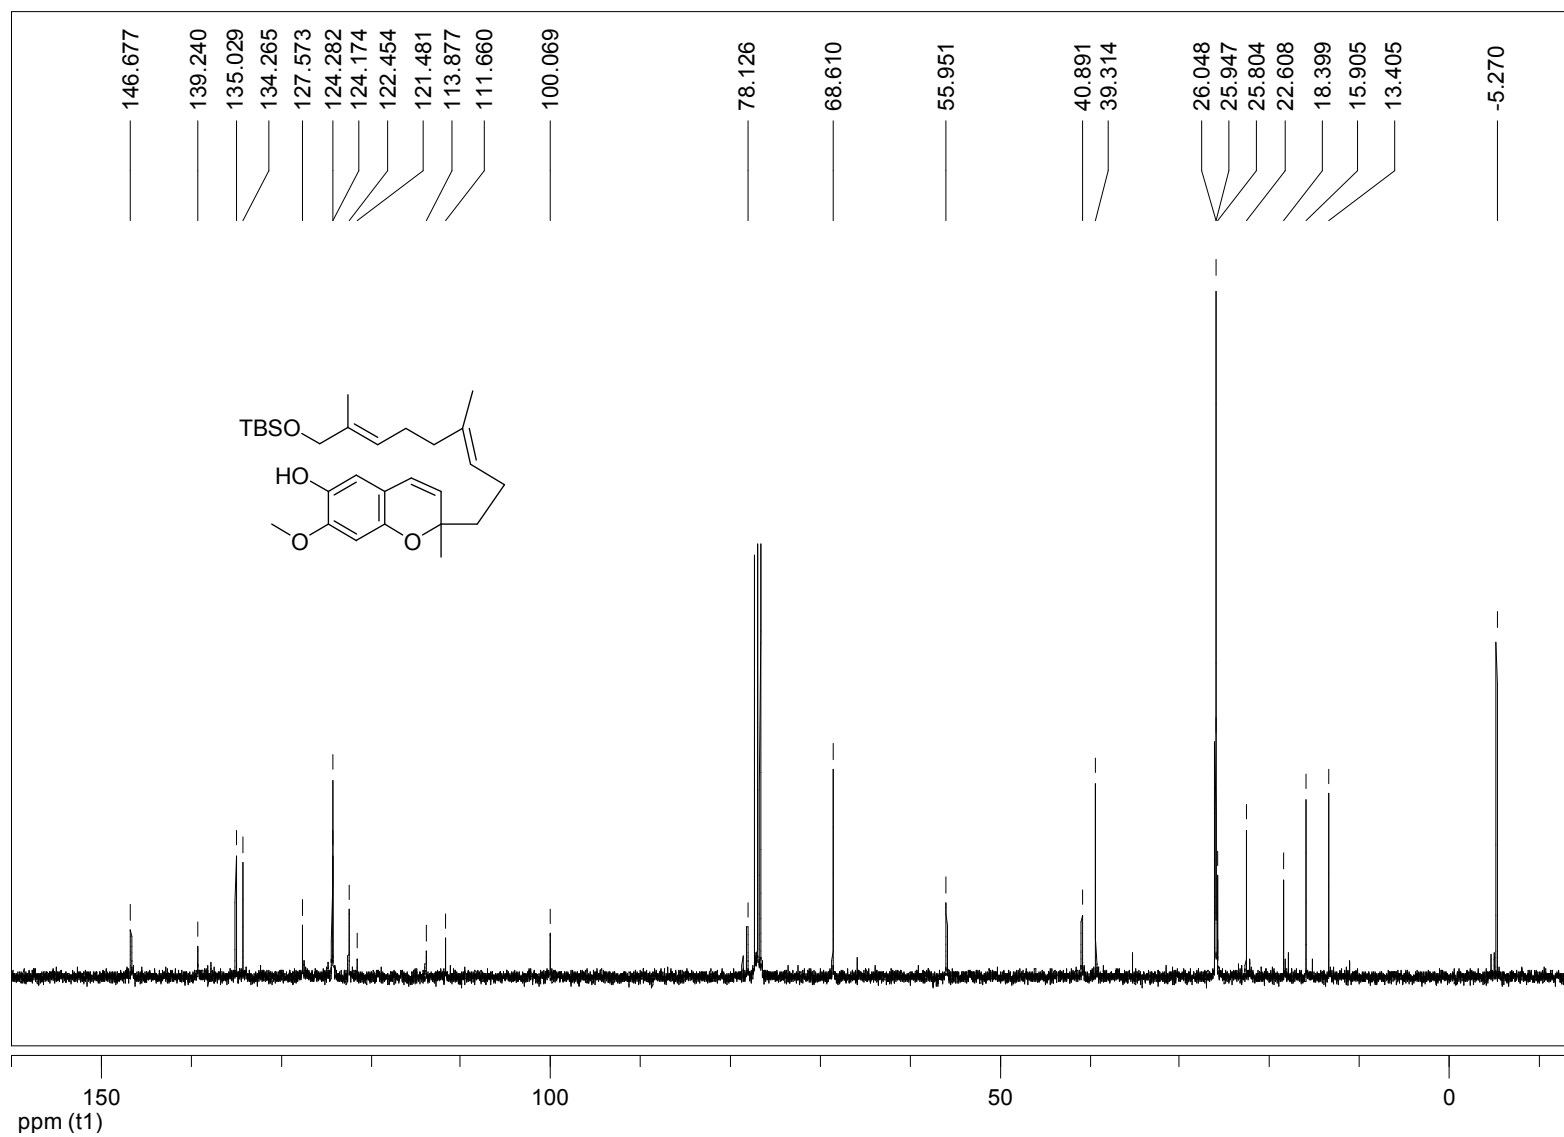

2-[(3'*E*,7'*E*)-9'-hydroxy-4',8'-dimethylnona-3',7'-dienyl]-7-methoxy-2-methyl-2*H*-chromen-6-ol **18**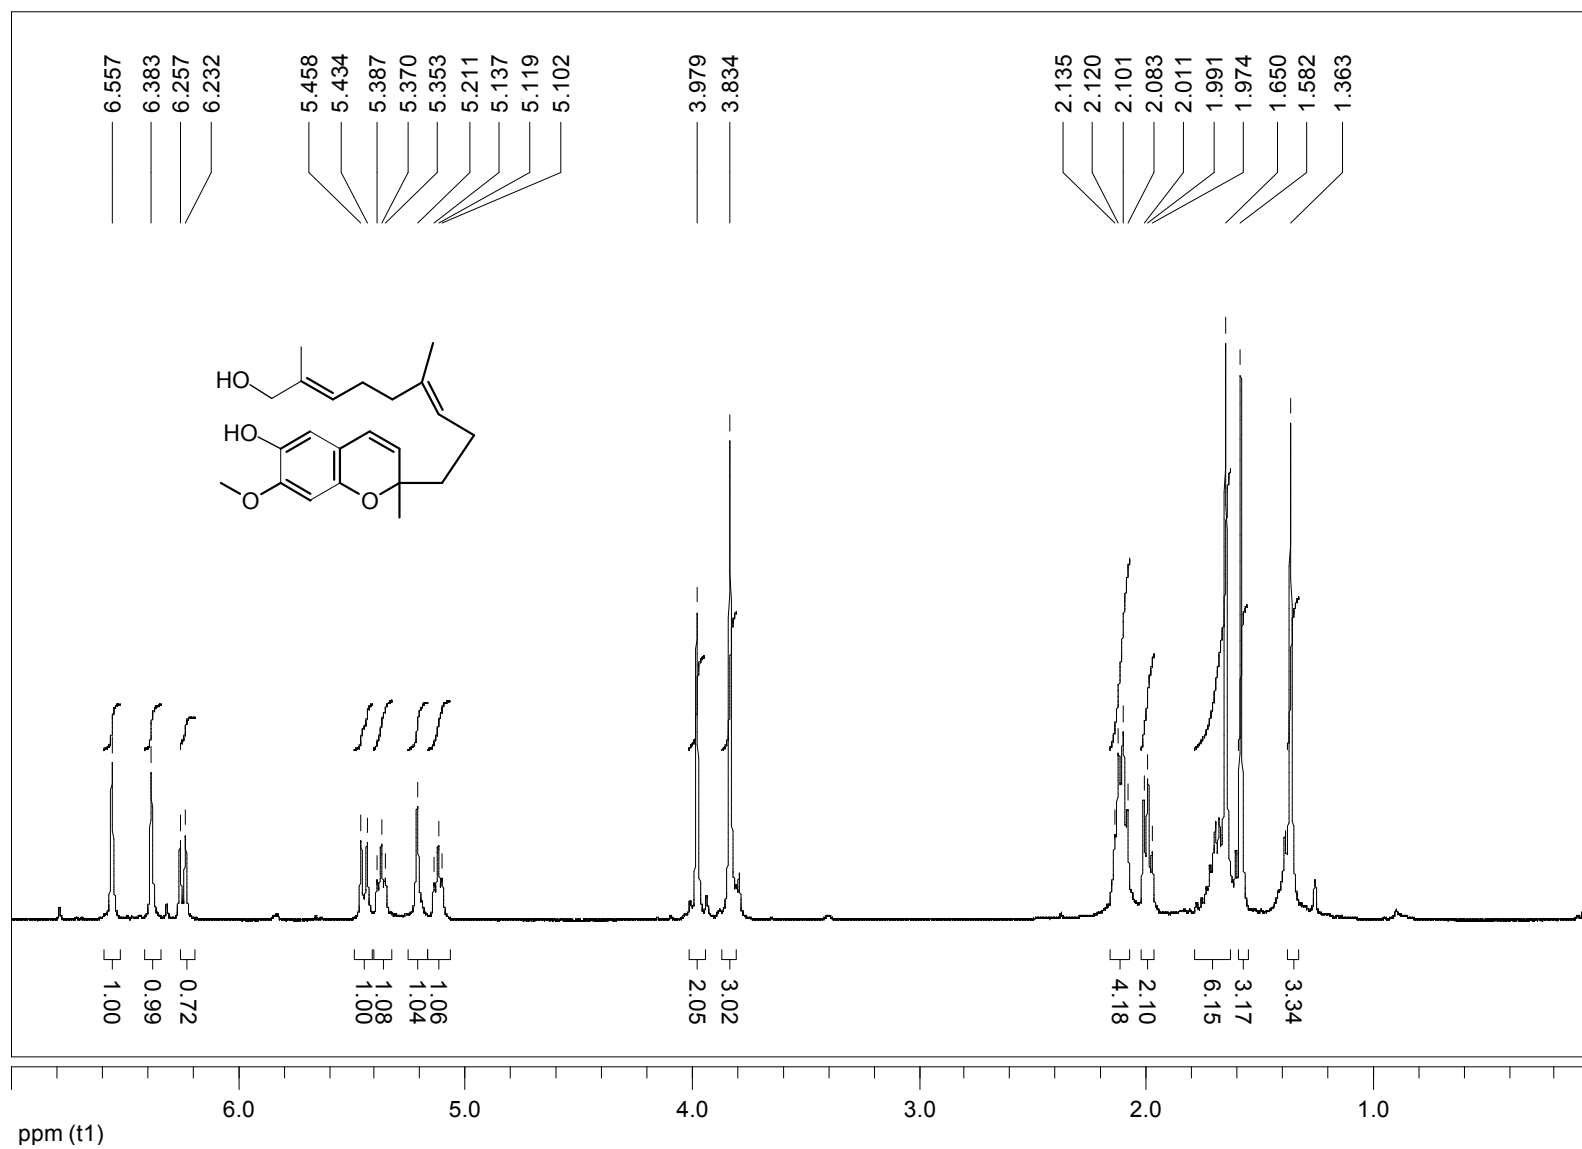

2-[(3'*E*,7'*E*)-9'-hydroxy-4',8'-dimethylnona-3',7'-dienyl]-7-methoxy-2-methyl-2*H*-chromen-6-ol **18**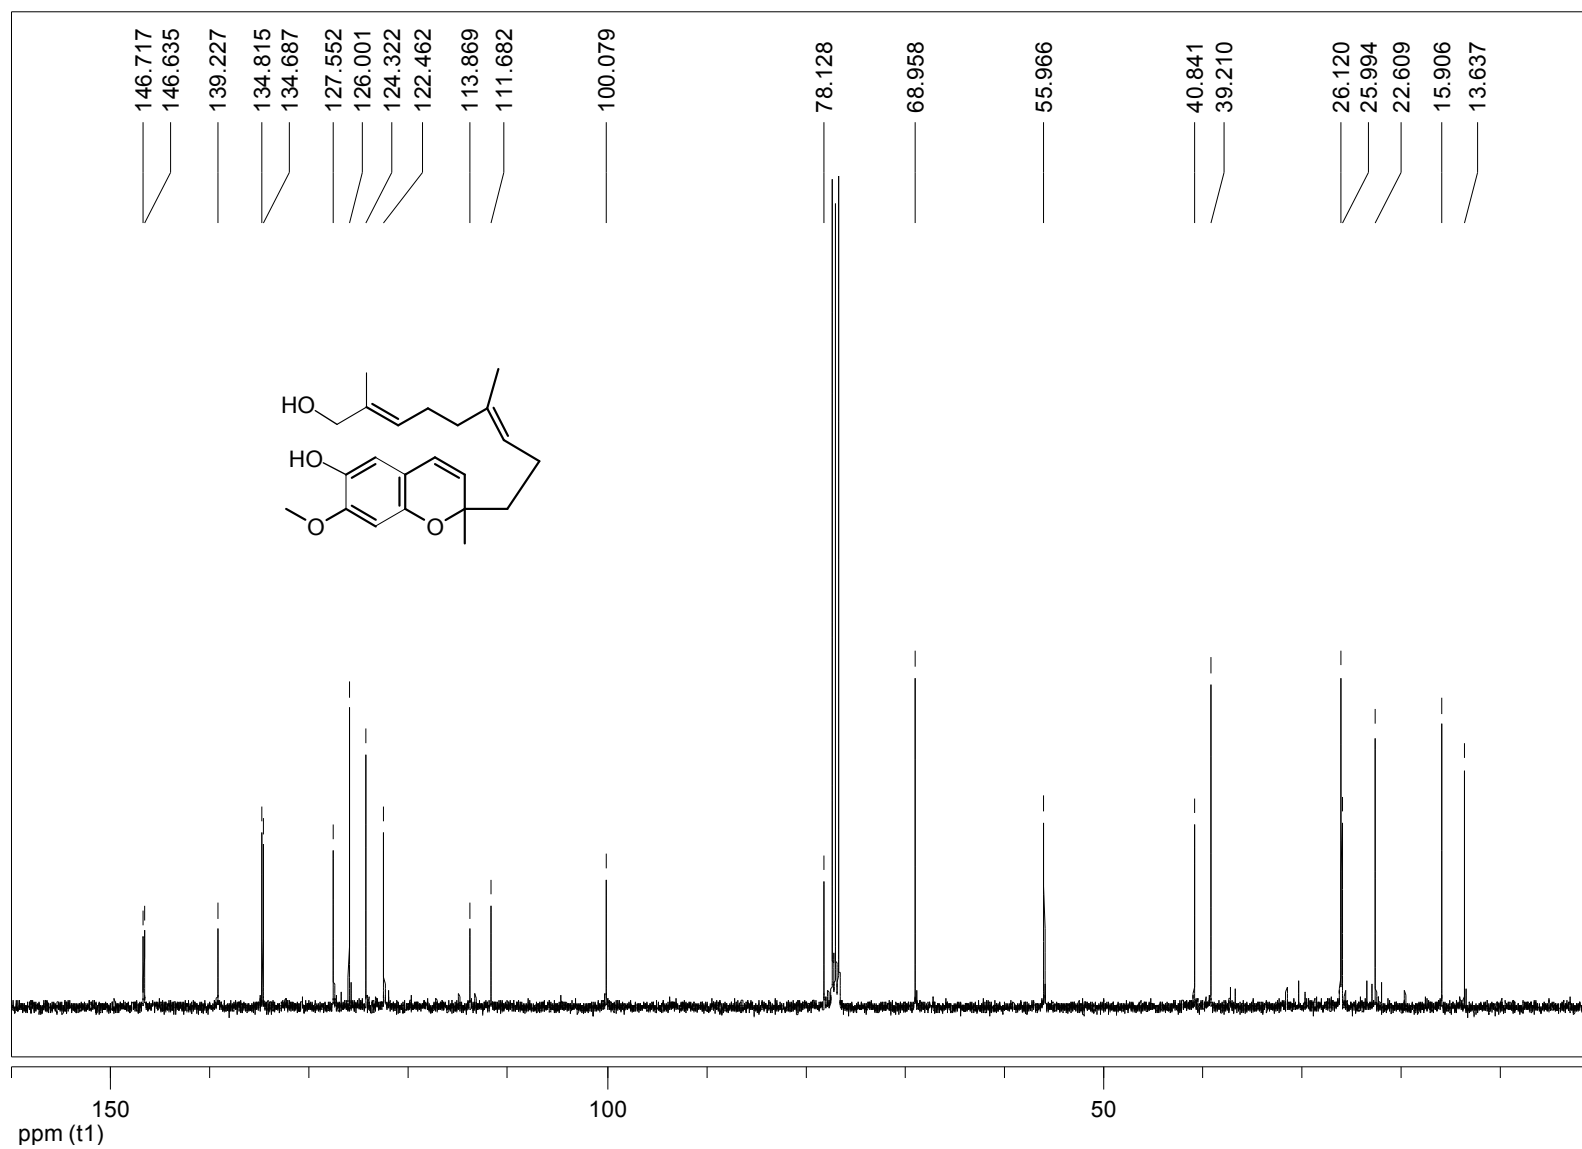

$(\pm)$ -Likonide B [ $(\pm)$ -smenochromene D] (DMSO)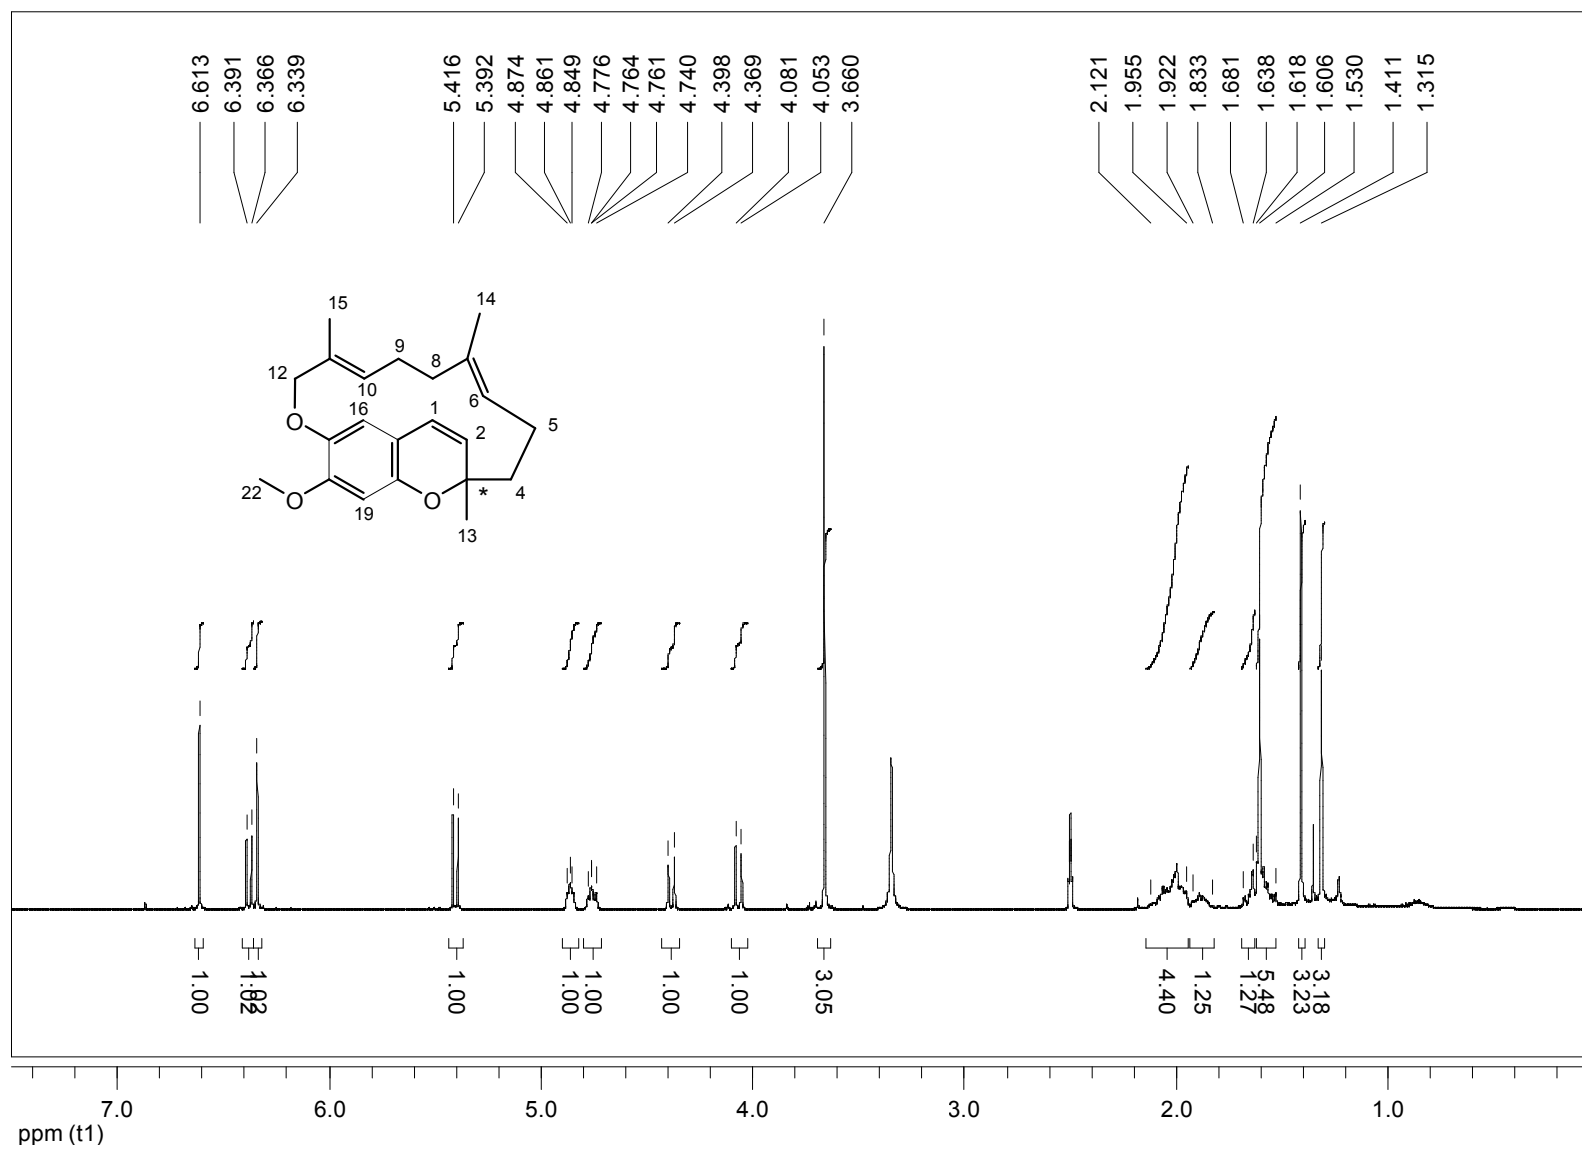

$(\pm)$ -Likonide B [ $(\pm)$ -smenochromene D] (DMSO)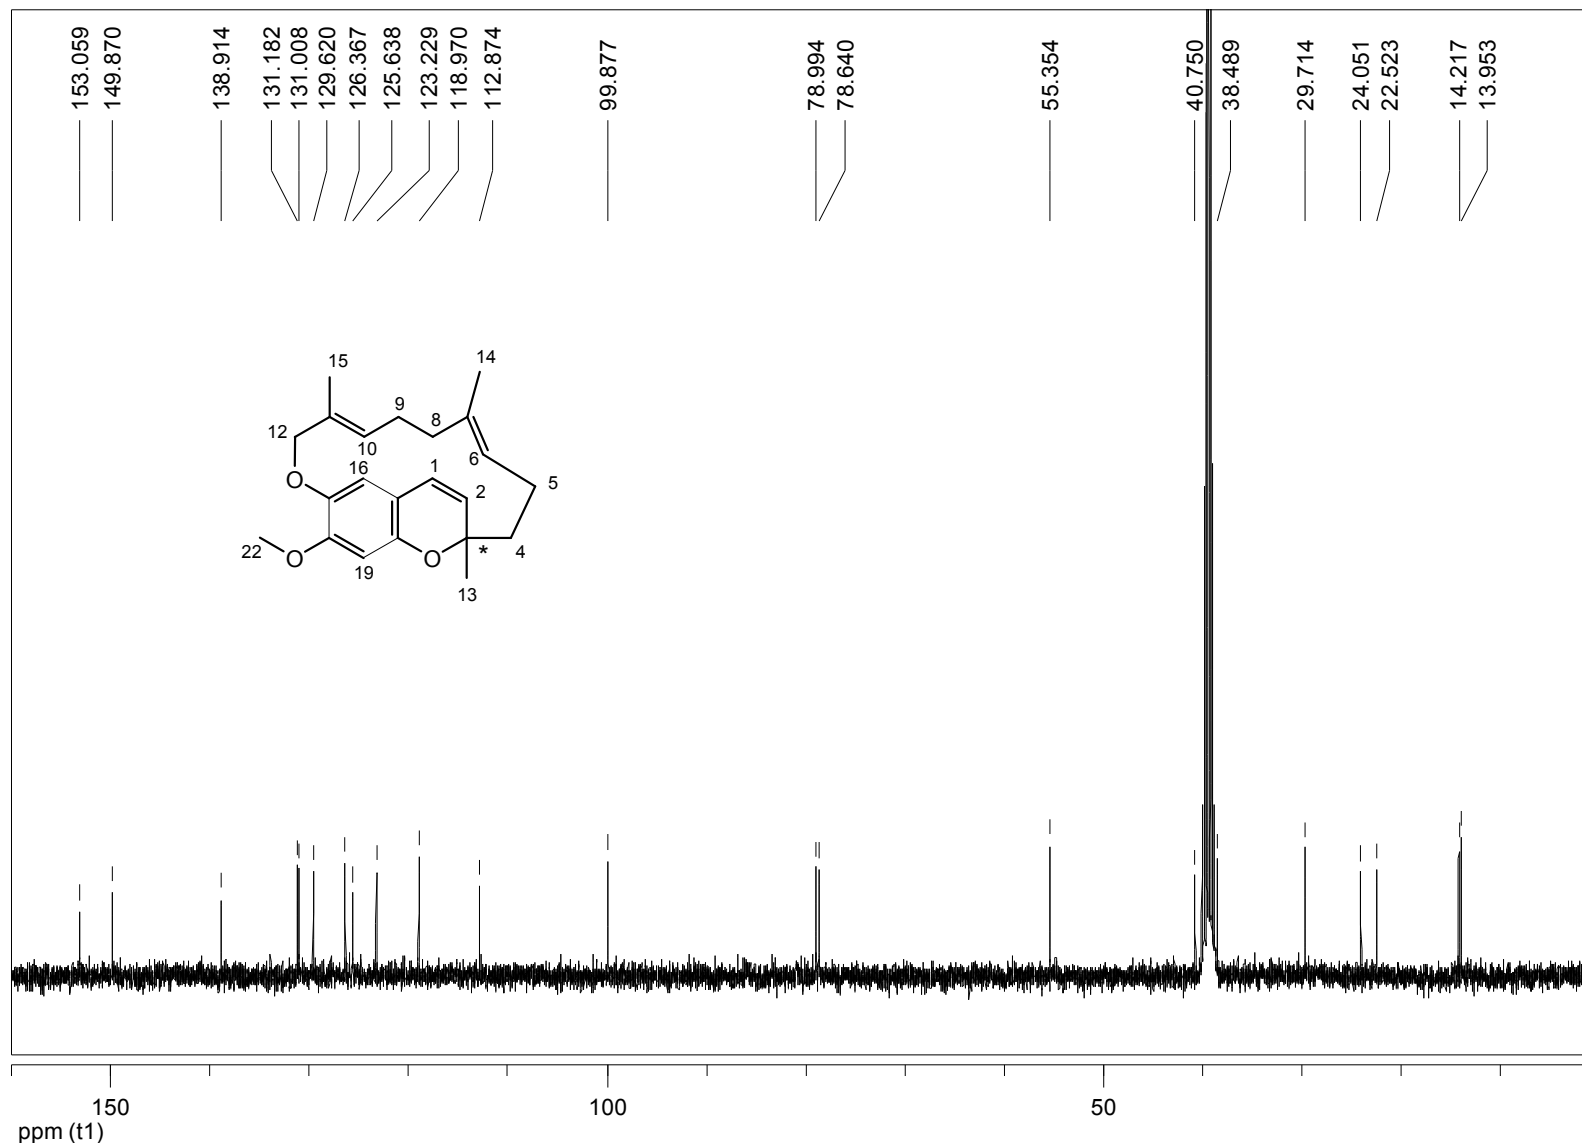

## Dimer 19

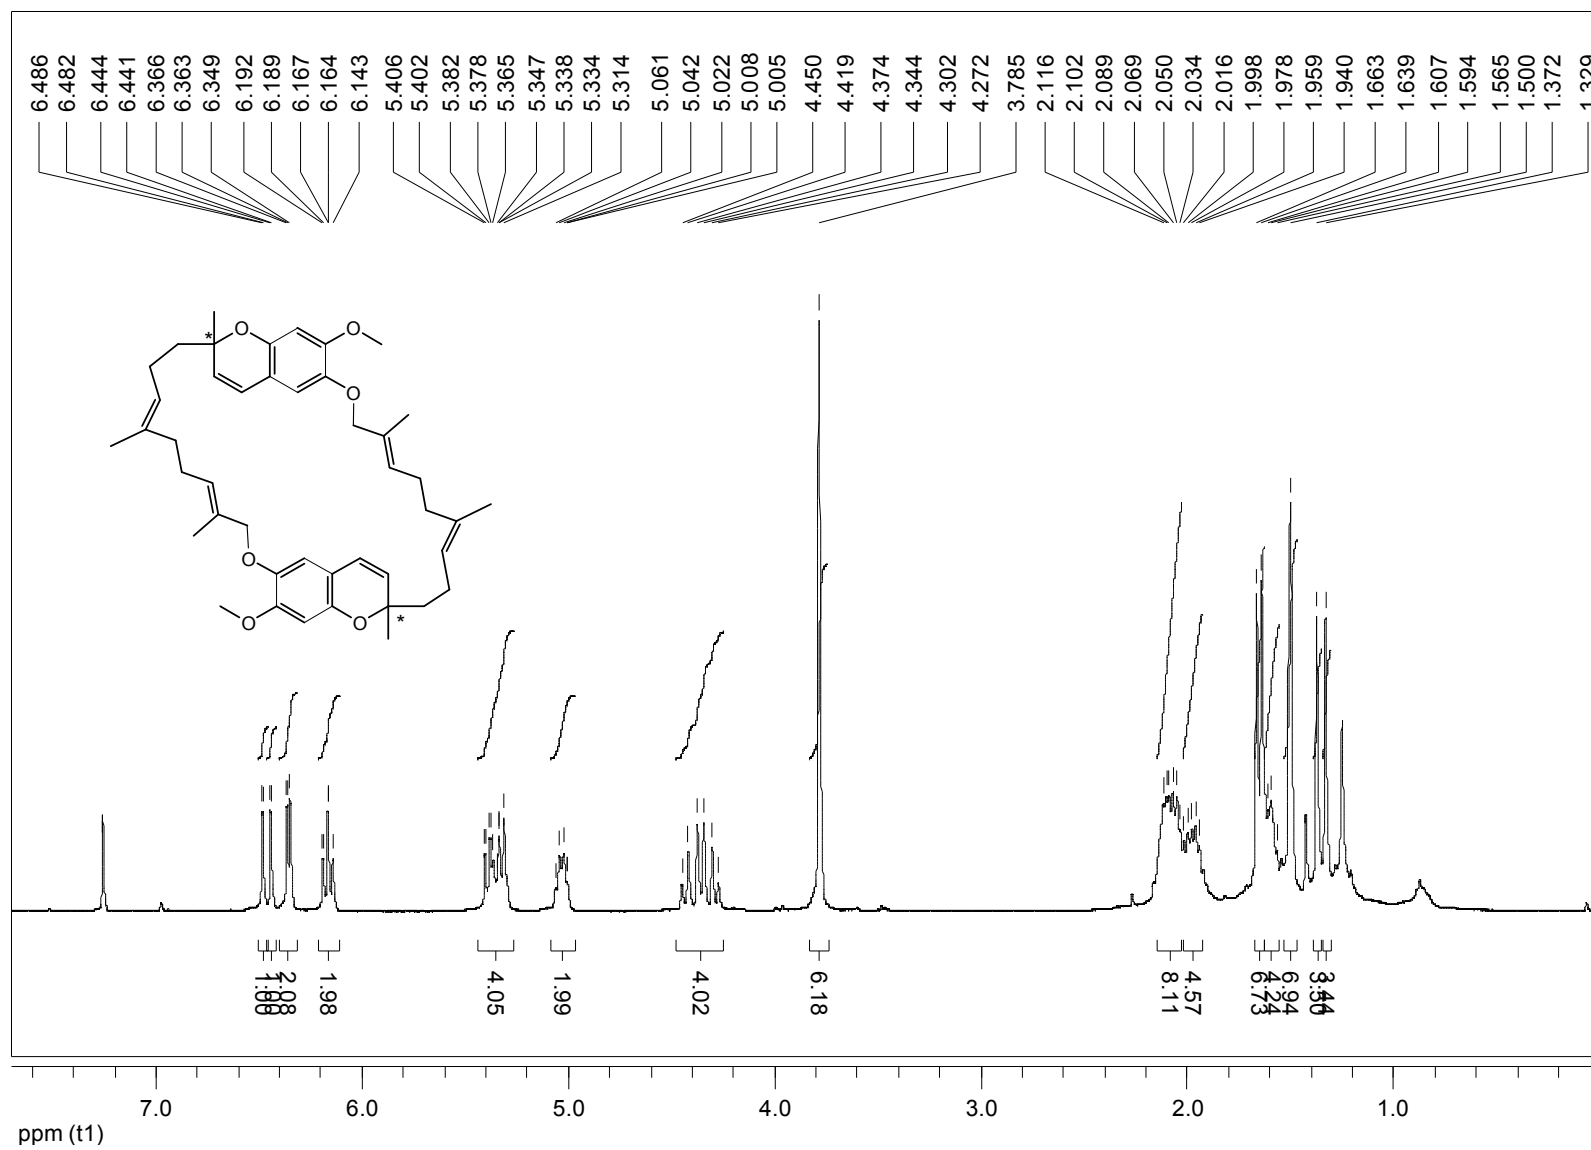

## Dimer 19

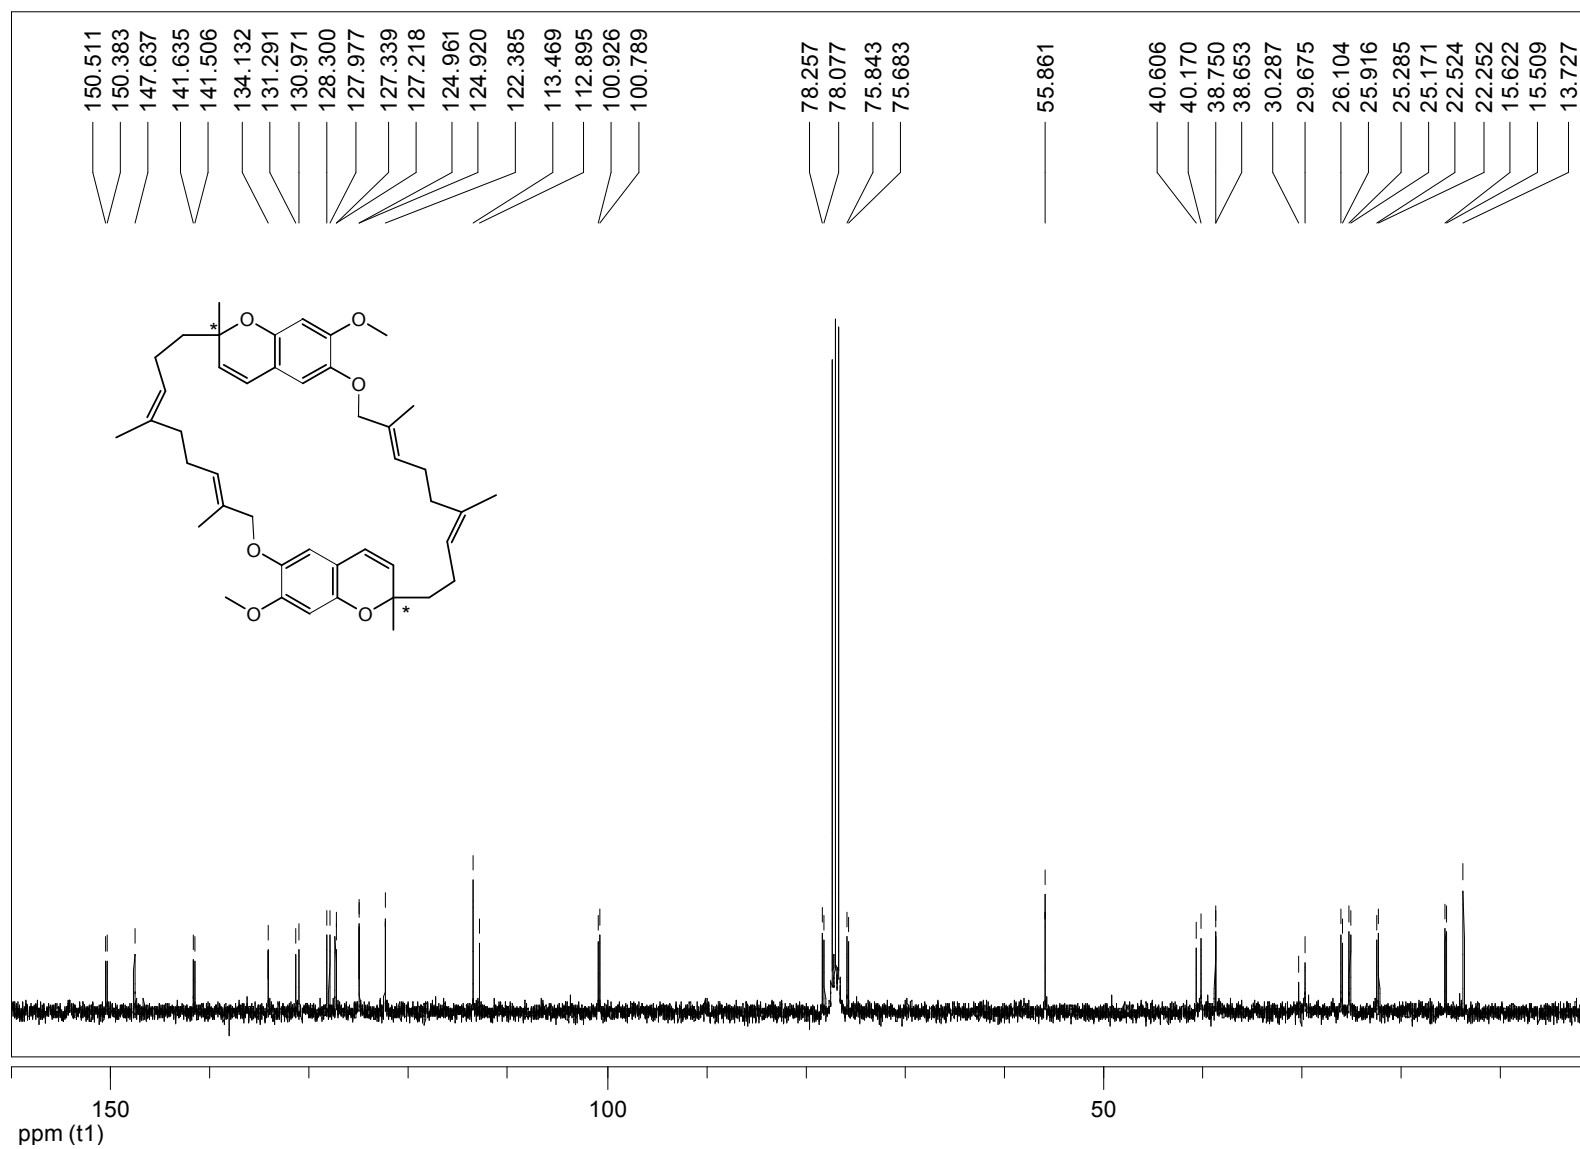

Supplement: b901358j.pdf [file b901358j.pdf]
